# Supplementary material for: Widespread Rewiring of Genetic Networks upon Cancer Signaling Pathway Activation
Source: PubMed Central journal article supplement — Cell Syst. 2018 Jan 24;6(1):52–64.e4. doi: 10.1016/j.cels.2017.10.015 (PMC5791663; doi:10.1016/j.cels.2017.10.015), 2018-01-24
Supplement: mmc4.pdf [file mmc4.pdf]

## Widespread Rewiring of Genetic Networks upon Cancer Signaling Pathway Activation

### Graphical Abstract

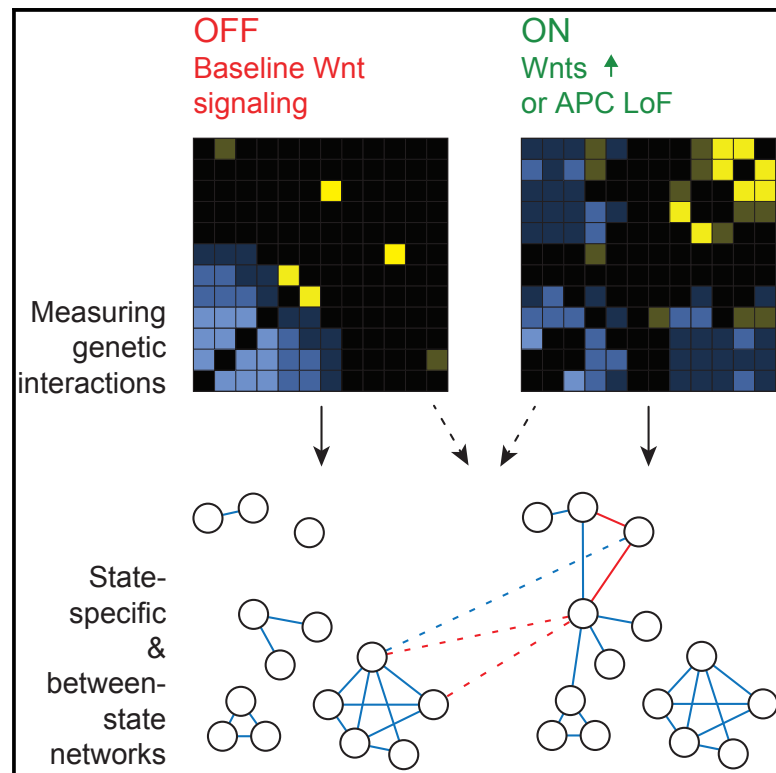

### Authors

Maximilian Billmann, Varun Chaudhary, Mostafa F. ElMaghraby, Bernd Fischer, Michael Boutros

### Correspondence

m.boutros@dkfz.de

### In Brief

Systematic measurement of genetic interactions between components of the Wnt pathway before and after pathway activation reveals how the pathway is rewired upon perturbation.

### Highlights

- Genetic interaction networks of Wnt signaling in three cellular states
- Networks rewire upon activation of Wnt pathway by ligand or by loss of APC
- Interaction profiles identify known and novel state-dependent pathway modules
- State-specific and between-state profile similarity identify signaling regulators

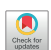

# Widespread Rewiring of Genetic Networks upon Cancer Signaling Pathway Activation

Maximilian Billmann,<sup>1,4</sup> Varun Chaudhary,<sup>1,5</sup> Mostafa F. ElMaghraby,<sup>1</sup> Bernd Fischer,<sup>2,6</sup> and Michael Boutros<sup>1,3,7,\*</sup>

<sup>1</sup>German Cancer Research Center (DKFZ), Division Signaling and Functional Genomics and Heidelberg University, Department of Cell and Molecular Biology, Faculty of Medicine Mannheim, Im Neuenheimer Feld 580, 69120 Heidelberg, Germany

<sup>2</sup>German Cancer Research Center (DKFZ), Computational Genome Biology Group, Im Neuenheimer Feld 580, 69120 Heidelberg, Germany

<sup>3</sup>German Cancer Consortium (DKTK), 69120 Heidelberg, Germany

<sup>4</sup>Present address: Department of Computer Science and Engineering, University of Minnesota – Twin Cities, 200 Union Street SE, Minneapolis, MN 55455, USA

<sup>5</sup>Present address: Department of Biological Science, Indian Institute of Science Education and Research Bhopal, Bypass Road, Bhauri, Bhopal 462066, India

<sup>6</sup>We would like to dedicate this paper to Bernd Fischer (deceased February 22, 2017)

<sup>7</sup>Lead Contact

\*Correspondence: [m.boutros@dkfz.de](mailto:m.boutros@dkfz.de)

<https://doi.org/10.1016/j.cels.2017.10.015>

## SUMMARY

Cellular signaling networks coordinate physiological processes in all multicellular organisms. Within networks, modules switch their function to control signaling activity in response to the cellular context. However, systematic approaches to map the interplay of such modules have been lacking. Here, we generated a context-dependent genetic interaction network of a metazoan's signaling pathway. Using Wnt signaling in *Drosophila* as a model, we measured >290,000 double perturbations of the pathway in a baseline state, after activation by Wnt ligand or after loss of the tumor suppressor APC. We found that genetic interactions within the Wnt network globally rewired after pathway activation. We derived between-state networks that showed how genes changed their function between state-specific networks. This related pathway inhibitors across states and identified genes required for pathway activation. For instance, we predicted and confirmed the ER-resident protein Catsup to be required for ligand-mediated Wnt signaling activation. Together, state-dependent and between-state genetic interaction networks identify responsive functional modules that control cellular pathways.

## INTRODUCTION

Genetic interactions can reconstruct the wiring diagram of biological processes in health and disease. Such interactions are identified by simultaneously perturbing multiple gene products and identifying instances when the expected and experimentally measured phenotypes significantly deviate (Baryshnikova et al., 2013; Bateson, 1909). Systematic experimental approaches have been deployed to build maps of

cellular processes in unicellular (Costanzo et al., 2010, 2016; Typas et al., 2008) and multicellular organisms (Fischer et al., 2015; Horn et al., 2011; Lehner et al., 2006), to place novel components into known pathways, and to delineate hierarchical relationships between components (Fischer et al., 2015; Horn et al., 2011).

Wnt signaling is a key signaling pathway conserved from hydra to man and has been implicated in cell differentiation, cell proliferation, and stem cell maintenance (Clevers and Nusse, 2012). Aberrant activation of Wnt pathways has been found in many cancers. For example, loss-of-function mutations in the adenomatous polyposis coli (APC) gene are found in more than 80% of all colorectal cancers (Korinek et al., 1997). Under physiological conditions, the tumor suppressor APC is required for the function of the destruction complex, which prevents  $\beta$ -catenin/Arm from triggering Wnt signaling target gene expression (Behrens et al., 1998). Loss of APC function leads to pathway activation in a largely ligand-independent fashion. Upstream and downstream of the destruction complex, pathway activity is additionally regulated by feedback loops acting at the ligand and receptor level, respectively (Kakugawa et al., 2015; Zeng et al., 2000), and context-dependent modulators of target gene transcription (Cavallo et al., 1998; Li et al., 2007). Moreover, target genes at the transcriptional level (Ji et al., 2013) and the presentation of receptors at the membrane determine pathway activity (Niehrs, 2012). Together, these factors control pathway activity in the absence of ligands. Understanding how these modules are linked in different pathway states and how components may “switch” their role has remained a question not fully understood.

In this study, we used genetic interaction analysis before and after activation of the Wnt pathway by a ligand or by loss of function of APC to investigate stable and “switchable” functional relationships. We found that state-specific interaction profiles describe stable functional relationships. In contrast, between-state correlations identified instances when gene function adapted after induction of a specific state. This categorized genes required for ligand-mediated pathway activation or restriction of pathway activity after specific modes of induction.

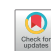

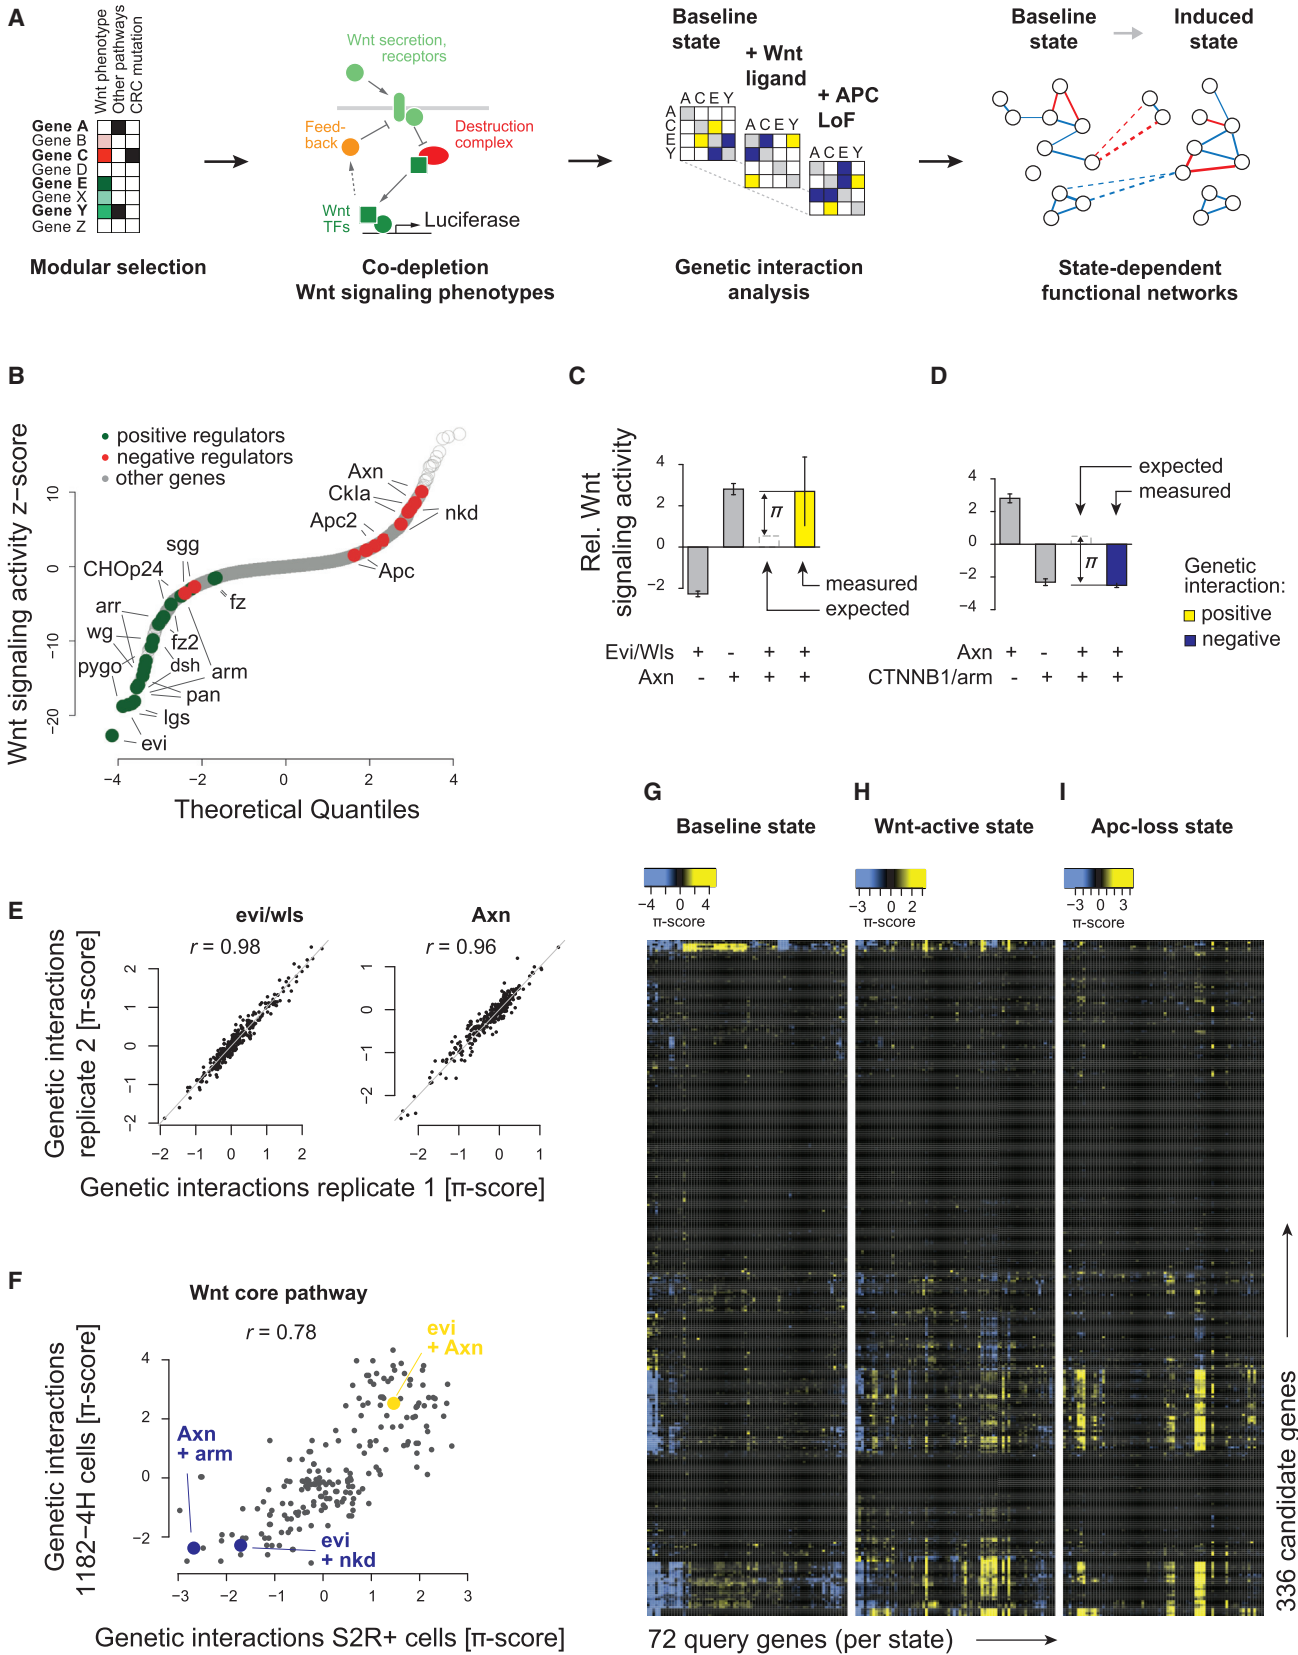

(legend on next page)

## RESULTS

### State-Specific Genetic Interactions of Wnt Signaling

To dissect functional relationships in Wnt signaling, we chose a two-step approach (Figure 1A). We first screened genome-wide for Wnt signaling modulators in Wnt signaling competent *Drosophila* S2R<sup>+</sup> and 1182-4H cell lines using at least two sequence-independent RNAi reagents per gene (Figures 1B, S1A, and S1B). We selected genes for genetic network analysis, prioritizing hits that were consistently identified in both cell lines (Figure S1B). This resulted in 336 genes, including genes involved in transcriptional regulation, chromatin remodeling, cell communication or vesicle trafficking, and other biological processes (Figure S1C), covering a wide range of Wnt signaling phenotypes in the genome-wide screen (Figure S1D). We then generated a state-dependent genetic interaction network in the baseline state and when the pathway was induced by the canonical *Drosophila* Wnt ligand Wingless (Wg) (Figures S2A and S2B) or simultaneous knockdown of the functionally redundant *Drosophila* *Apc* and *Apc2* (Figures S2B and S2C), which mimicked the APC loss-of-function pathway state. We co-depleted 336 selected genes with a functionally representative subset of 72 genes in quadruplicates (all combinations of two independent RNAi reagents) across three pathway states. In total, 290,304 co-RNAi experiments (plus 13,824 experiments including one non-targeting control RNAi reagent) were performed in S2R<sup>+</sup> cells using viability-normalized dTCF-luciferase reporter gene activity as a phenotypic readout. Genetic interactions were inferred from these co-RNAi Wnt signaling activity phenotypes by computing the deviation from the expected phenotype ( $\pi$ -score; Figures 1C, 1D, and S3A–S3C) (Horn et al., 2011).

Genetic interactions of Wnt signaling in the same state were highly reproducible between biological replicates (Figures 1E, S2D, and S2E) and in different cell lines (Figure 1F), while they showed global pathway state dependency (Figures 1G–1I, S2D, S3D, and S3E). For example, co-depletion of the Wnt secretion machinery and the destruction complex by knockdown of the Wnt cargo receptor Evi/Wls and the negative regulator Axn was equivalent to the single knockdown effect of Axn alone (Figure 1C). This positive genetic interaction was only present in the Wnt-active state (BH-adjusted  $p$ -values: 0.95 [baseline], 0.002 [Wnt-active], 0.76 [Apc-loss]; Figure S3A). In

contrast, a negative genetic interaction between Axn and the downstream target gene transcription activator  $\beta$ -catenin/Arm was measured in all pathway states (BH-adjusted  $p$ -value:  $<0.0005$  [all states]; Figures 1D and S3B). Genetic interactions distinguished different negative regulators of Wnt signaling. Destruction complex components (e.g., Axn) and feedback regulators such as nkd act downstream of the ligand/receptor complex. While their individual depletion increases pathway activity, in contrast to Axn, nkd showed a negative genetic interaction with Evi/Wls (Figures S3A and S3C). At the level of functional complexes, it is well established that members of such a complex have the same interaction sign with each other (within complex) as well as with members of other complexes (between complexes) (Segre et al., 2005). We observed that this so-called monochromaticity within and between functional modules of the Wnt signaling route was highly dependent on its state (Figures S3D and S3E). Overall, genetic interactions both among and between functional modules of the Wnt pathway depended on the mode of activation.

### State-Specific Relations Connect Functionally Similar or Opposing Genes

Signaling routes are controlled by modules, which activate or inhibit the signal in a context-dependent fashion (Housden and Perrimon, 2014). To understand the interplay of such modules after pathway activation, we reconstructed functional relationships at different levels. First, we inferred functional relations between genes by calculating the Pearson correlation coefficient (PCC) between the genetic interaction profiles of all gene pairs and each state (Baryshnikova et al., 2010; Horn et al., 2011). This reconstructed functional similarities of genes, such as the high correlation between profiles of Axn and Ckl $\alpha$  (positive correlation,  $\rho < 2.2e-16$ , Pearson product-moment correlation) (Figure 2A). We also identified inhibitory relations, such as the negative regulation of the Wnt receptor complex component DVL1-3/Dsh by Nkd in the Wnt-active state (negative correlation,  $\rho = 8.5e-14$ ) (Figure 2B). Overall, genetic interaction profile correlation was higher for gene pairs for which protein-protein interactions were measured in S2R<sup>+</sup> cells (Figures S3F–S3I) (Gurharsha et al., 2011). Together, this enabled systematic identification of relations between components that act in the same functional module such as the ligand secretion machinery, the receptor or destruction complex or target gene transcription, and

### Figure 1. State-Dependent Genetic Interactions of Wnt Signaling Enable the Estimation of Signed Functional Relations

(A) Schematic workflow for state-dependent genetic interaction analysis.  
 (B) Wnt pathway activity z-scores in S2R<sup>+</sup> cells of 28,950 independent double-stranded RNAs (dsRNAs) covering 14,331 genes of the *Drosophila* genome. The scores of the two independent dsRNA designs against core Wnt pathway components known to affect the activity positively (green) or negatively (red) are labeled.  
 (C and D) Combinatorial RNAi to quantify genetic interactions within the Wnt pathway. Single knockdown phenotypes were estimated from phenotypes of two independent dsRNAs in 144 different genetic backgrounds each (error bars show SE of median determined by bootstrapping). The white dashed bar indicates the expected combinatorial knockdown effect for each gene pair using a multiplicative neutrality function. The measured combinatorial phenotype illustrates the median of the four possible combinations of two independent dsRNA designs against each gene. The difference between the expected and measured combinatorial phenotype is quantified as a  $\pi$ -score for each genetic interaction (yellow if positive, blue if negative at false discovery rate  $<1\%$ ). The data are presented at  $\log_2$  scale. Examples show measurements in the Wnt-active state, for all three states see Figures S3A, S3B, S3D, and S3E.  
 (E) Reproducibility of  $\pi$ -scores with rescreened (four replicates each) query genes *evi/wls* and *Axn*, which cover the secreting cell and the destruction complex. Further rescreened query genes are illustrated in Figure S2E. Correlations are highly significant ( $p < 2.2e-16$ ).  
 (F) Genetic interaction ( $\pi$ ) scores between 14 core pathway components in *Drosophila* S2R<sup>+</sup> and 1182-4H cells (PCC, 0.78;  $p < 2.2e-16$ ). Gene pairs from (C) and (D) and Figure S3C are highlighted.  
 (G–I) Genetic interaction scores in the three Wnt pathway states: baseline state, and after induction by Wg expression or *Apc* and *Apc2* knockdown (low Wg levels). Candidate and query genes have the same order in each panel.

## State-specific relations

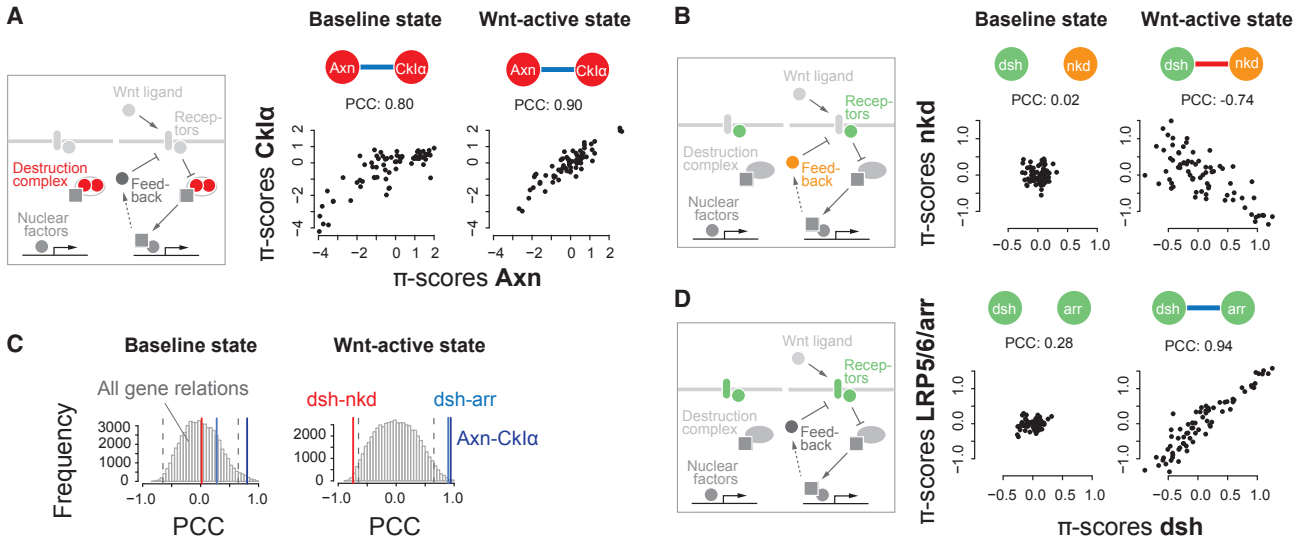

## Between state relations

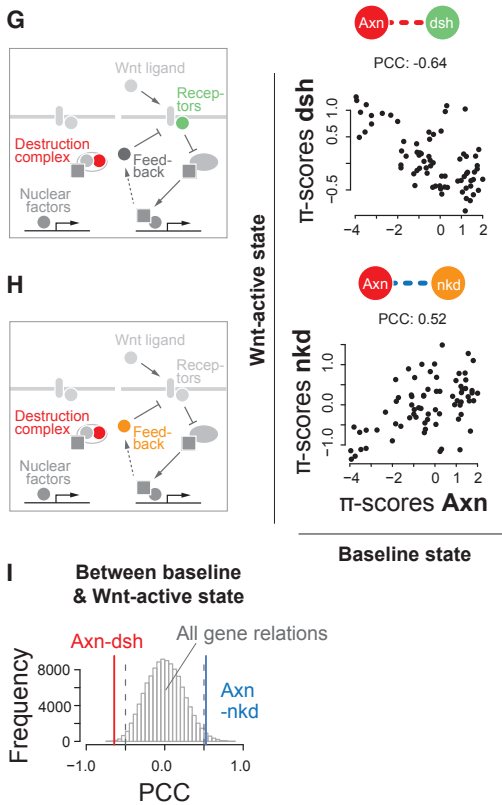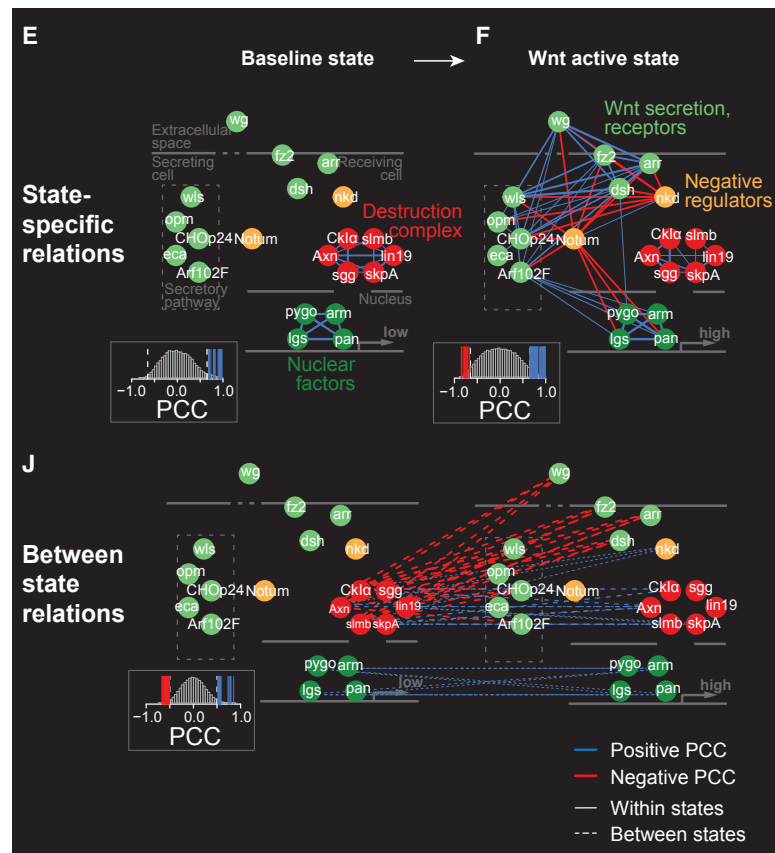

**Figure 2. Between-State and State-Specific Functional Relations Visualize Change of Gene Function and Rewiring of the Core Wnt Signaling Network**

(A–D) State-specific correlation between genetic interaction profiles of the destruction complex components Axn and Ck1 $\alpha$  (both states:  $p < 2.2e-16$ , Pearson product-moment correlation) (A), dsh and nkd (baseline:  $p = 0.88$ ; Wnt-active:  $p = 8.5e-14$ ) (B) or receptor complex components LRP5/6/arr and dsh (baseline:  $p = 0.02$ ; Wnt-active:  $p < 2.2e-16$ ) (D) in the baseline and Wnt-active state. Each profile contains 72 quantitative genetic interaction ( $\pi$ ) scores. (C) Correlation coefficients from (A), (B), and (D) in relation to the 56,280 measured coefficients in each respective state.

(legend continued on next page)

relations between modules that affect Wnt signaling in a similar (positive) or antagonizing (negative) fashion.

Next, we investigated the dependency of positive and negative functional relations on the state of the Wnt pathway. The components of the destruction complex Axn and Ckl $\alpha$  showed high genetic interaction profile correlation both in baseline and Wnt-active state ( $p < 2.2e-16$  in both states; Figures 2A and 2C). Similarly, additional proteins of the destruction complex and the nuclear factors *arm*, *pan*, *pygo*, and *BCL9/lgs* were connected in each state (Figures 2E and 2F). In contrast, functional relations between receptor complex components Dsh and Arr (baseline:  $p = 0.02$ ; Wnt-active:  $p < 2.2e-16$ ), or Dsh and the feedback regulators Nkd ( $p = 0.88$ ,  $p = 8.5e-14$ ) occurred in the Wnt-active state only (Figures 2B–2D). In the derived network, components required for Wnt signaling were connected by positive edges, whereas inducible negative regulators of the pathway showed negative associations with those components (Figures 2E and 2F). Together, the data demonstrated state-dependent rewiring of functional relations between genes.

### Between-State Relations Identify Functional Adaptation to Control Pathway Activation

The destruction complex is the central regulatory module of Wnt signaling. Surprisingly, the state-specific network did not connect the destruction complex to other modules of the Wnt pathway (Figures 2E and 2F). We hypothesized that state-specific interaction analysis missed functional relationships of genes that act mutually exclusively in either state. For instance, the destruction complex inhibits pathway activity in the absence of ligands whereas the ligand-bound receptor complex prevents the destruction complex from doing so. Therefore, only one of those functional modules can be active at a time, and visualizing their relationship requires the comparison of genetic interaction profiles between the states. Our data showed that the profile of Dsh in the ligand-induced state—where it is active—anticorrelated with the profile of Axn in the baseline state, where it inhibits Wnt signaling ( $p = 1.08e-9$ ; Figures 2G and 2I). Moreover, Axn in the baseline state showed high similarity with Nkd in the induced state ( $p = 2.13e-6$ ; Figures 2H and 2I), which takes over as a negative regulator of Wnt signaling once the pathway is induced and the destruction complex allows pathway activity to increase. In the core Wnt signaling pathway, we observed a similar pattern for all the destruction complex components with the receptors Dsh, Arr, or Fz2 or the negative regulators of the ligand-induced pathway Nkd and Notum (Figure 2J). Globally, such between-state relations were rare, with 1.8% (Wnt-active) and 0.3% (Apc-loss), or 0.9% (Wnt-active) and 0.3% (Apc-loss) of all gene pairs showing a coefficient larger than 0.5 or smaller

than  $-0.5$ , respectively. Our data suggest that between-state genetic interaction profile correlation identifies how functional relationships change after pathway activation. This involved cases in which both partners switch their function in Wnt signaling after activation. Together, positive and negative state-specific and between-state relations detect the process-level structure of regulatory modes to control pathway activity.

### Functional Adaptation of Genes only Partially Responsible for Network Rewiring

To assess how genes changed in function between states, we identified two distinct scenarios of between-state relations. Here, a gene's reference profile in a given state can be compared with profiles in a different state of the same gene (which we term self-correlation or self-similarity) or another gene (gene-gene correlation). To investigate how gene function adapts to pathway activation, we first estimated between-state self-correlations after ligand- or Apc-loss-mediated pathway activation. We observed that, globally, the complete set of genes tested exhibited higher self-similarity than expected by chance (both modes of activation:  $p < 2.2e-16$ , one-sided Welch's *t*-test). However, many individual genes exhibited relatively low self-similarity, including some that exhibited non-significant between-state profile correlation (Figure 3A). To account for low self-correlation due to a lack of genetic interaction variation in the profiles, we defined genes that changed their profile to develop high state-specific similarity or dissimilarity with other genes in the network (Figure 3B). We found that components facilitating ligand secretion and receptor binding, or mediating feedback regulation such as *nkd* and *Notum*, showed low self-correlation after Wnt-mediated pathway activation, suggesting that this metric identifies functional adaptation. Several factors of other signaling routes exhibited large changes in their interaction profiles (Figure 3B). This involved *yki* (Hippo signaling), *Pi3K59F*, *c-Fos/kay*, and *c-Jun/Jra* (phosphatidylinositol 3-kinase and JNK signaling), *Mek1/2/Dsor1* and *Ets1/2/pnt* (Ras signaling), or *smo* (Hedgehog [Hh] signaling). *Dsor1* and *pnt* were connected to *yki* via the chromatin remodeler *trx*, *ash1*, and *Br140* in the state-specific Wnt-active network (Figure 3C). Another state-specific subnetwork connected the Hh signaling receptor *smo* to the non-canonical Wnt ligand Wnt5 and Golgi trafficking components *Gmap*, *Rab6*, and *CG6761*, which had low self-similarity (Figure 3C). Interestingly, low self-correlation predicted rewiring of the state-dependent network for some modules only: While profiles of Wnt receptor complex components *arr* and *dsh* showed low self-correlation and their functional similarity only emerged after pathway activation (Figures S4A and S4B), JNK pathway components *Jra* and *kay* showed high similarity in each pathway state despite their

(E and F) State-specific correlation-based networks connecting core Wnt pathway components involved in ligand secretion and receptor complex binding (green), negative feedback (orange), the destruction complex (red), or target gene transcription (dark green) in baseline (E) or Wnt-active (F) states. The similarity or dissimilarity of each gene pair was estimated by computing Pearson correlation coefficient (PCC) between the genetic interaction profiles. Genes with an absolute PCC > 0.65 were connected. The edge width represents the absolute value of the coefficient; the color indicates positive (blue) or negative (red) correlation.

(G–I) Between-state correlation between genetic interaction profiles of Axn and *dsh* ( $p = 1.08e-9$ ) (G), or Axn and *nkd* ( $p = 2.13e-6$ ) (H). (I) Correlation coefficients from (G) and (H) in relation to the 112,896 measured coefficients between baseline and Wnt-active state.

(J) Between-state correlation-based network connecting core Wnt pathway components involved in ligand secretion and receptor complex binding (green), negative feedback (orange), the destruction complex (red), or target gene transcription (dark green) between baseline and Wnt-active state. Genes with an absolute PCC > 0.5 were connected.

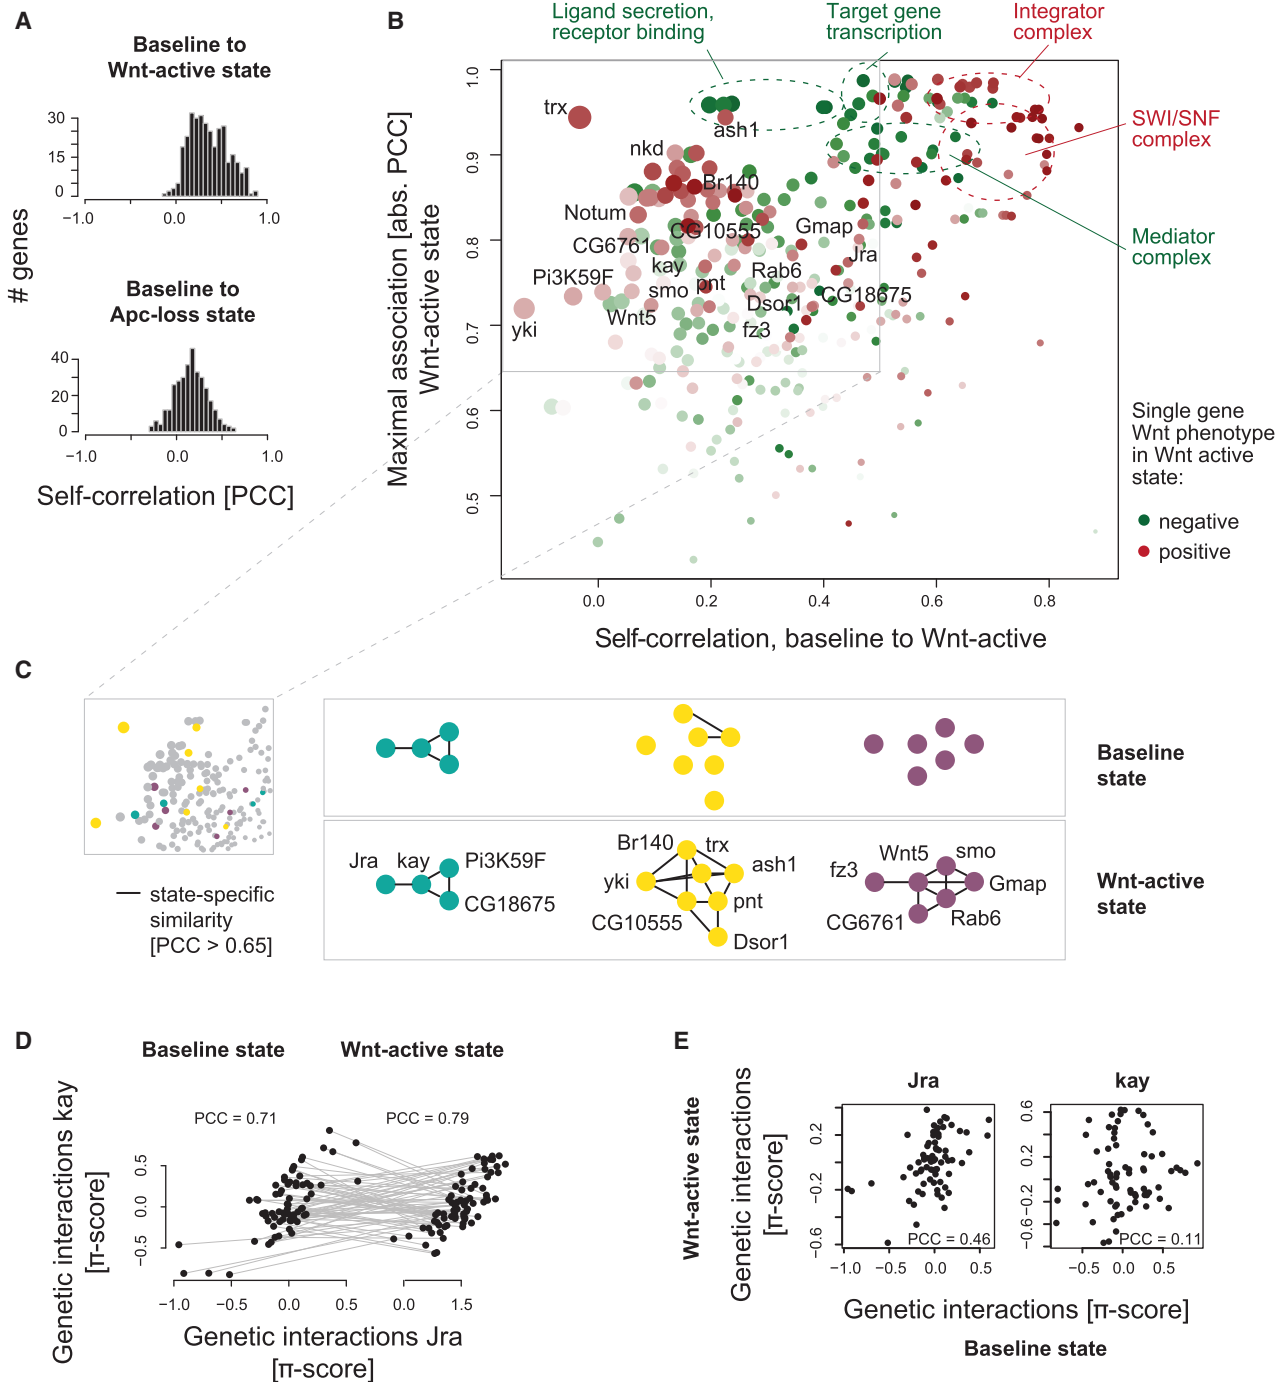

**Figure 3. Rewiring after Pathway Activation Partially Caused by Change in Gene Function**

(A) Distribution of self-correlation of all tested genes between baseline and Wnt-active (left) or Apc-loss (right) state.

(B) Self-correlation (x axis) and maximal association (y axis) after pathway induction. The maximal association represents the highest absolute PCC of each gene in the Wnt-active state. The color illustrates positive (red) or negative (green) single knockdown Wnt signaling phenotypes in the Wnt-active state.

(C) Zoomed-in networks illustrate state-specific similarity (PCC > 0.65) between selected genes with a low autocorrelation.

(D) Change of genetic interaction profiles of JNK signaling transcription factors Jra and kay from baseline to Wnt-active state.

(E) Self-correlation of Jra and kay between baseline and Wnt-active state.

low self-correlation (Figures 3D and 3E). Other state-specific subnetworks connecting genes with low self-correlation showed an emerging similarity between *pnt* and *trx* after pathway activa-

tion (Figures S4C and S4D), whereas *trx* and *ash1* shared high similarity in both states (Figures S4D–S4F). Together, this illustrated that self-similarity of genes between states can indicate

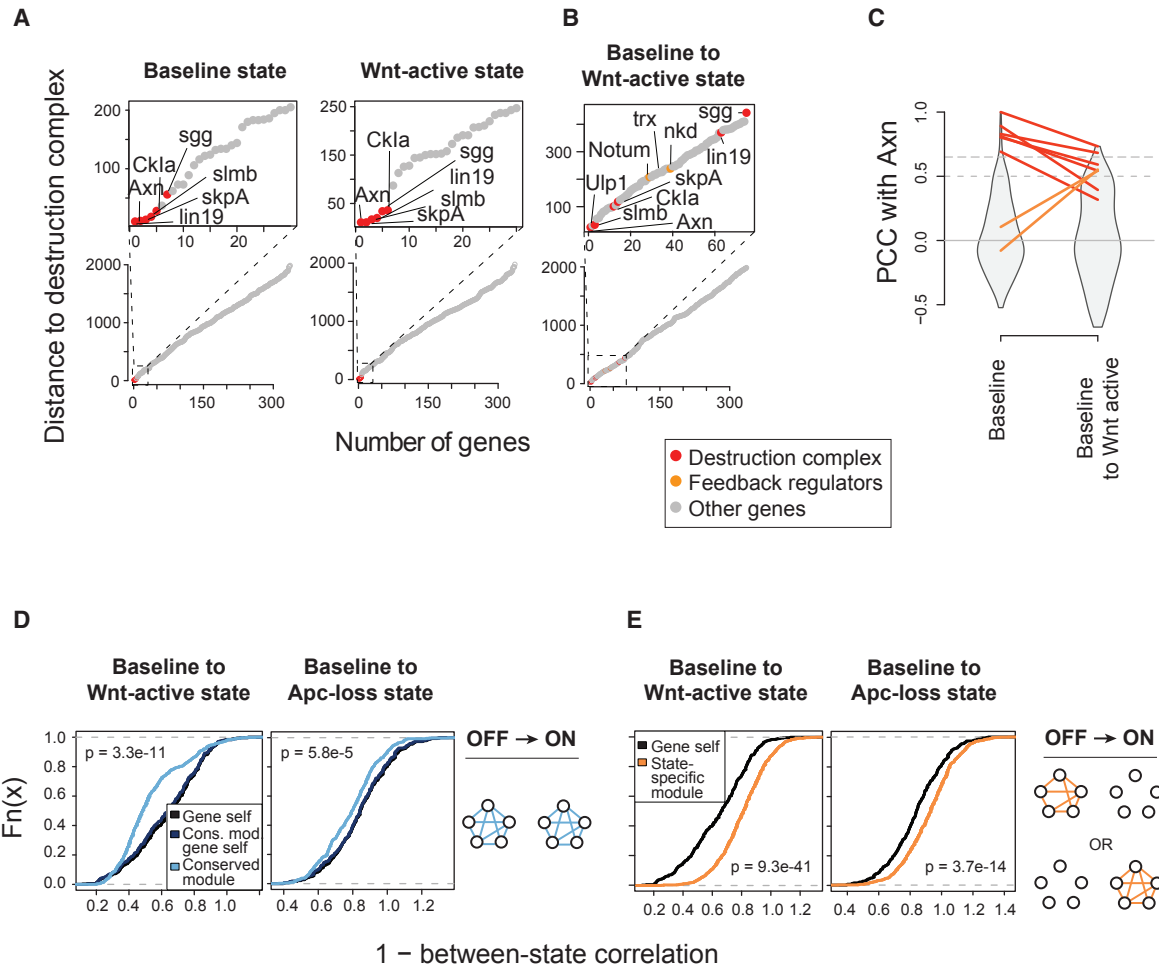

**Figure 4. Plasticity of Functional Relations in Modules after Pathway Activation**

(A) State-specific cumulative rank-based distance to the six destruction complex components *Axn*, *Ckla*, *slmb*, *sgg*, *skpA*, and *lin19*.  
 (B) Between-state cumulative rank-based distance from the destruction complex. The rank of the PCC of each gene with a destruction complex component was computed and ranks were summed per gene.  
 (C) Comparison of baseline-specific similarity (PCC between genetic interaction profiles) with baseline and Wnt-active state similarity of baseline state *Axn* with other destruction complex components (red) or negative feedback regulators (*nkd*, *Notum*) (orange).  
 (D) Between-state relations among components of stable functional modules. Stable functional relations exceeded a connection specificity index (CSI) of 0.9 in the baseline and respective activated state. Self-correlation of all tested genes is illustrated in black; the dark-blue line represents the self-correlation of genes in stable modules.  
 (E) Between-state relations among components state-specific functional modules. State-specific relations exceeded a CSI of 0.9 in either the baseline or activated state but not in the respective other state (CSI < 0.7). Self-correlation of all tested genes is illustrated in black. Curves were compared using a one-sided Wilcoxon rank-sum test.

that their functions change even if their state-specific relationship to other genes does not rewire.

#### Functional Plasticity and Compensation within Modules

Gene-gene correlations after pathway activation were significantly lower than self-correlations (Figure S5A). Therefore, we assessed how well between-state relations predicted intra-module functional plasticity of genes after pathway activation. We used the destruction complex as an example and computed the cumulative rank distance of the correlation coefficients of its components in and between the baseline and Wnt-active states. In both states, all components of this complex were clearly distinguishable from the remaining genes (Figure 4A). In

contrast, between-state relations showed that after ligand induction, those genes diverged from destruction complex baseline state function (Figures 4B, 4C, S5B, and S5C). In particular, *sgg*/*GSK3* showed strongly decreased similarity to all destruction complex components in the baseline state (Figures S5B–S5D). Moreover, its depletion alone unexpectedly decreased pathway activity in the Wnt-active state (Figure S5E), possibly by supporting ligand-mediated pathway activation by triggering endocytosis of the ligand-bound receptor complex (Piao et al., 2008). Importantly, the between-state relations predicted similarity between baseline destruction complex function and feedback regulators in the Wnt-active state (Figures 4B and 4C). Many of those factors had not previously been described as



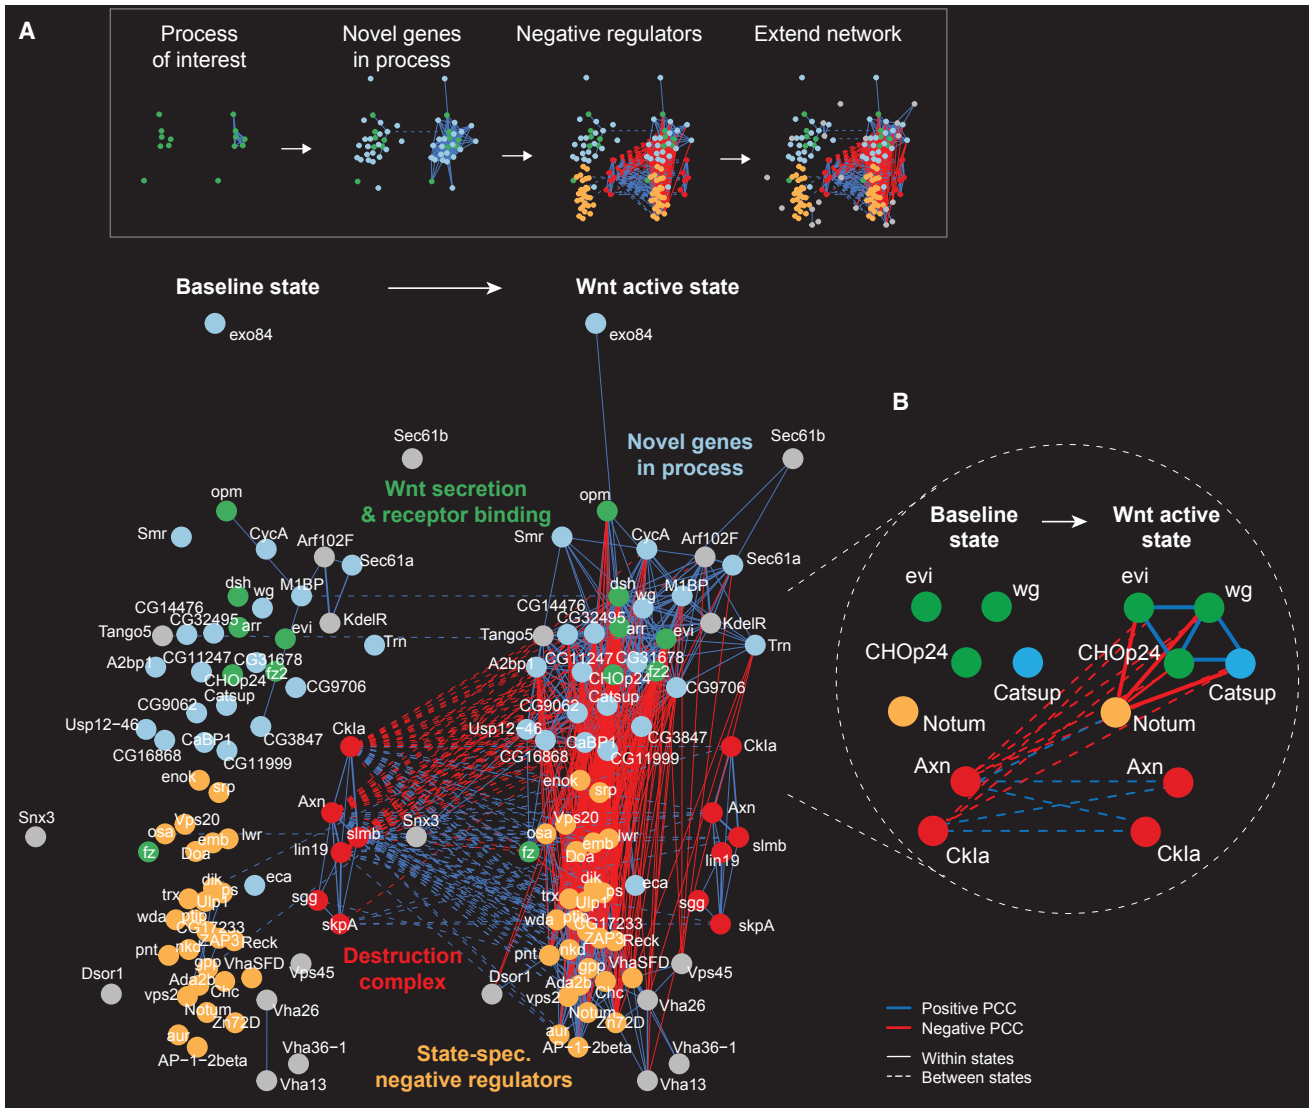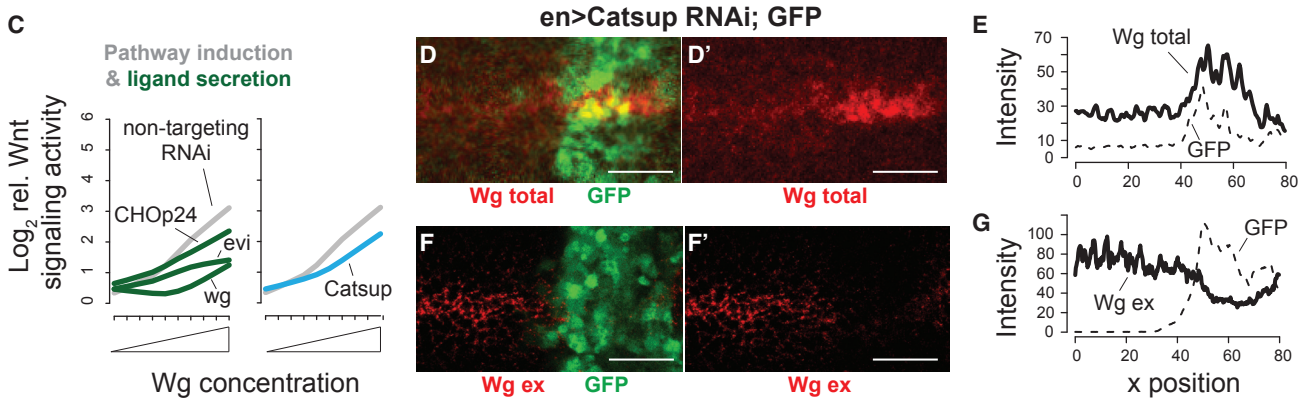

**Figure 5. A Ligand Induction-Specific Network of Wnt Signaling**

(A) Correlation-based network connecting components of Wnt secretion and receptor binding with potential co-regulatory modules. “Bait” genes required for ligand secretion and receptor binding (green nodes) were selected and potentially novel components (light-blue nodes) were called if they shared a CSI > 0.9 in the Wnt-active state. Potential negative regulators (orange nodes) were added if they shared a between-state similarity (PCC > 0.5) with the destruction complex (red nodes) and a Wnt-active state-specific dissimilarity (PCC < -0.65) with at least one “bait” gene. The network was further extended for genes sharing a

(legend continued on next page)

Wnt pathway regulators and also showed an inhibitory effect on Wnt pathway activity after ligand-mediated pathway induction (Figure S5F, red lines). Together, between-state relations, inferred from between-state interaction profile correlation, can be used to visualize how gene function adapts in the activated pathway and pinpoint genes that promote or restrict pathway activity after induction.

Finally, we compared between-state gene-gene similarity in modules that were either functionally stable or state-specific after pathway activation. First, we identified such modules by computing the connection specificity index (CSI), which corrects the genetic interaction-based PCC for unspecific high coefficients for each gene (Billmann et al., 2016; Fuxman Bass et al., 2013; Green et al., 2011) (Figures S5G and S5H). Using a CSI larger than 0.9, which was observed for 1.4% (baseline), 1.8% (Wnt-active), or 1.3% (Apc-loss) of all gene pairs, we identified two types of modules: stable modules associated genes in the baseline and the respective activated state, whereas state-specific modules showed associations in either the baseline or the activated state. We observed that between-state gene-gene relations in the stable modules were significantly higher than self-similarity of the genes regardless of the mode of pathway activation (Figure 4D). In contrast, gene-gene relations in modules specific to one state were lower than self-similarity of genes in those modules (Figure 4E). In conclusion, gene-gene relations in functional modules can strongly contribute to plasticity or functional stability.

### A Regulatory Network at and above the Wnt Receptor Level

To place potentially novel regulators identified by genome-wide screening in the architecture of the Wnt pathway at and above the receptor level, we selected the genes *evi/wls*, *opm*, and *CHOp24*, which are required for ligand secretion, and receptor complex components *fz*, *fz2*, *arr*, and *dsh* (Figure 5A, green nodes). To this seed network, we connected genes with a functional similarity (CSI > 0.9) with at least one of the selected genes in the Wnt-active state. Those potentially novel pathway factors comprised components of the ER-resident N-glycosylation machinery including the acetyl-coenzyme A transporter CG9706, galactose-binding motif containing CG31678, the putative mannosyltransferase CG11999 and CG14476, as well as genes regulating ion levels in the secretory pathway such as CG32495 and *Catsup* (Figure 5A, light-blue nodes). Interestingly, the human CG14476 ortholog and glucosidase II $\alpha$  subunit GANAB has recently been identified as a positive regulator of canonical Wnt signaling in human HAP1 cells (Lebensohn et al., 2016). Next, to identify genes that control ligand-mediated

pathway activity, we selected genes if their Wnt-active interaction profile was similar to that of the baseline state destruction complex (between-state PCC > 0.5), indicating an inhibitory role in the ligand-activated pathway. We furthermore required those genes to also antagonize the ligand secretion and receptor binding apparatus as suggested by their high dissimilarity (state-specific PCC < -0.65) to the seed network (Figure 5A, orange nodes). For example, this subnetwork visualized high similarity between the feedback regulator and inhibitor of the Wnt receptor complex Nkd with factors regulating AP-2-mediated clathrin-dependent endocytosis, which had been reported to be required for ligand secretion and receptor binding (Pan et al., 2008). Finally, we extended this network by genes sharing high similarity (CSI > 0.9) with the novel positive and negative regulators of the pathway (gray nodes). For instance, this showed a conserved role for Arf102F in Wg-activated signaling, whose human orthologs ARF4/5 have previously been found to be required for proper secretion of Wnt ligands (Yu et al., 2014). Together, this stepwise approach identified a network of known and potentially novel genes required for ligand secretion and receptor binding, and connected them to negative regulators of ligand-induced Wnt signaling.

The Golgi-resident zinc transporter *Catsup* (Groth et al., 2013) showed high similarity with the ligand secretion machinery in the Wnt-active state and, similar to those factors, a strong dissimilarity with destruction complex components in the baseline state (Figure 5B), suggesting its requirement in Wg secretion. To confirm the predicted role for *Catsup*, we first demonstrated that it is required for Wg ligand-dependent Wnt pathway activation in S2R<sup>+</sup> cells (Figure 5C). We further observed that *Catsup* depletion *in vivo* in the developing wing imaginal disc led to accumulation of Wg in Wg-secreting cells and a strong reduction of extracellular Wg (Figures 5D–5G), resulting in the reduction of the high-threshold Wg/Wnt target gene *sens* (Figures S6A and S6B). The accumulation of Wg in the secreting cells was confirmed using clonal mosaic analysis of a loss-of-function *Catsup*<sup>47</sup> allele (Figures S6C and S6D), indicating that *Catsup* is required for proper Wg secretion.

### Regulation of Wnt Target Gene Transcription upon Ligand- versus Apc-Loss-Mediated Pathway Activation

Loss-of-function mutations in the destruction complex component APC lead to constitutively active Wnt signaling (Korinek et al., 1997; Morin et al., 1997). To reconstruct a regulatory network downstream of the destruction complex, we identified genes with a negative regulatory role in both active pathway states (Figure 6A), and genes with roles specific for the Wnt-active or Apc-loss states (Figures 6B and 6C). We assessed

CSI > 0.9 with potentially novel positive or negative regulators (gray nodes). Genes were connected if their state-specific profiles shared an absolute PCC > 0.65 or if their between-state shared an absolute PCC > 0.5 (dashed lines). Positive and negative correlations are shown as blue and red lines, respectively. Per state, the modules of positive regulators (green, light blue), negative regulators (orange), and the destruction complex (red) were separately arranged using a force-directed layout algorithm. The edge width represents the absolute PCC.

(B) State-specific (if |PCC| > 0.65) and between-state (if |PCC| > 0.5) relations of *Catsup* with the ligand secretion machinery and negative regulators.

(C) *Catsup* single depletion effect on Wnt signaling activity upon increasing Wg concentrations.

(D and E) Knockdown of *Catsup* in third instar wing imaginal disc leads to Wg accumulation in the Wg-producing cells. Total Wg staining intensity (red) was quantified using FIJI (n > 6 wing discs). enGal4, UAS-GFP/UAS-Catsup RNAi, posterior to the right (GFP positive). Scale bars, 20  $\mu$ m.

(F and G) Knockdown of *Catsup* leads to depletion of extracellular Wg. Extracellular Wg (Wg ex) was stained on living third instar imaginal disc without cell permeabilization. Staining intensity (red) was quantified using FIJI (n > 6 wing discs). enGal4, UAS-GFP/UAS-Catsup RNAi, posterior to the right (GFP positive). Scale bars, 20  $\mu$ m.

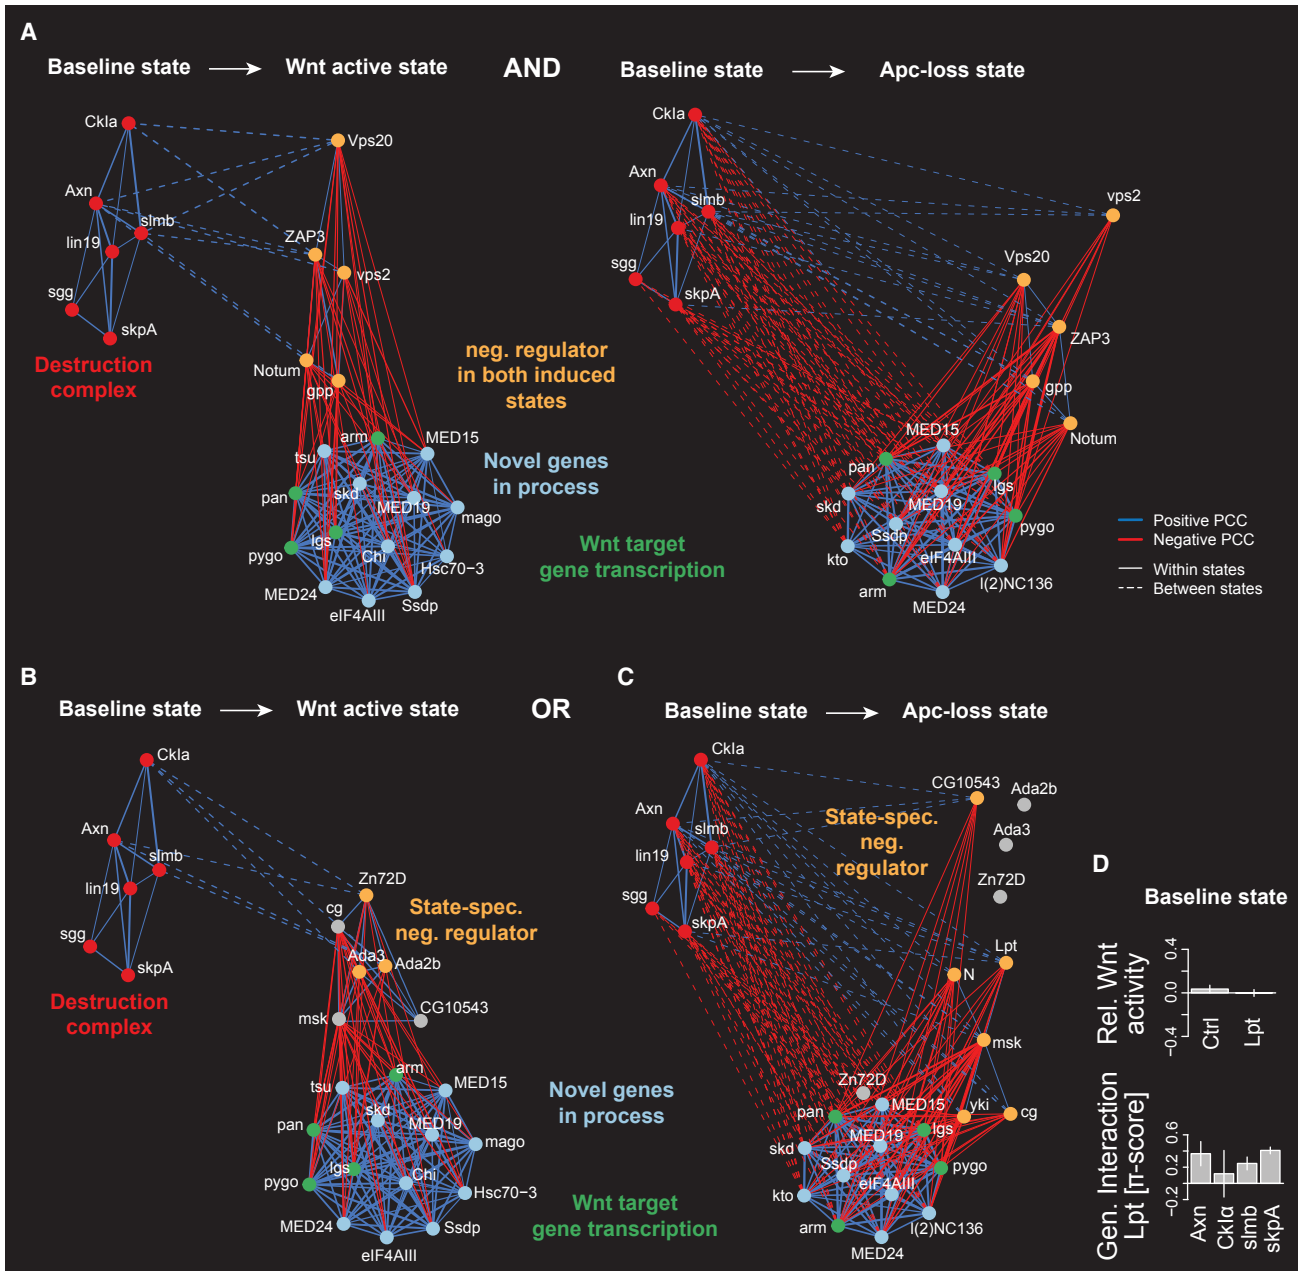

**Figure 6. Genes Resuming a Destruction Complex-like Role in Wnt Signaling in Different Pathway Activation Modes**

(A) Putative inhibitors of the Wnt target genes transcription machinery after ligand and Apc-loss-mediated pathway activation.

(B and C) Putative inhibitors of the Wnt target gene transcription machinery exclusively after ligand or Apc-loss-mediated pathway activation. “Bait” genes required for target gene transcription (green nodes) were selected and potentially novel components (light-blue nodes) were called if they shared a CSI > 0.9 in both active pathway states (A) or one but not the other active state (B and C). Potential negative regulators (orange nodes) were added if they shared a between-state similarity (PCC > 0.5) with the destruction complex (red nodes) and a state-specific dissimilarity (PCC < -0.65) with at least one “bait” gene. Genes were connected if their state-specific profiles shared an absolute PCC > 0.65 or if their between-state shared an absolute PCC > 0.5 (dashed lines). Positive and negative correlations are shown as blue and red lines, respectively. Per state, the modules of positive regulators (green, light blue), negative regulators (orange), and the destruction complex (red) were separately arranged using a force-directed layout algorithm. The edge width represents the absolute PCC.

(D) Lpt knockdown effect on Wnt signaling activity (upper panel) and the genetic interaction of Lpt with destruction complex components (lower panel) in the baseline state. The single knockdown phenotype was estimated from phenotypes of two independent dsRNAs in 144 different genetic backgrounds each (error bars show SE of median determined by bootstrapping). Error bars of the genetic interactions show the median absolute deviation of four independent genetic interaction scores for each gene pair.

genetic interaction profile similarity of its components in the baseline state with genes in the active states. We further filtered for genes that also showed high dissimilarity (state-specific PCC < -0.65) with the Wnt target gene transcription apparatus represented by *arm*, *pan*, *lgs*, and *pygo*, and all genes with a CSI > 0.9 with at least one of those genes. In the Wnt-active state, our data predicted a role for the transcriptional activators Ada2b, Ada3, and the zinc-finger binding protein Zn72D. The importin *msk* was positively associated with the predicted negative regulators, but could only be positively associated with baseline destruction complex function in the Apc-loss state (Figures 6B and 6C). In the Apc-loss state, we also found the nuclear effector of the Hippo signaling pathway *yki*, whose human homologs YAP1/TAZ had been described in regulating  $\beta$ -catenin stability (Azzolin et al., 2012), or the methyltransferase *Lpt* (Figure 6C). Interestingly, *Lpt* depletion in the non-induced pathway did not affect activity levels, but co-depletion with destruction complex components showed a positive genetic interaction (Figure 6D), indicating that *Lpt* restricts Wnt pathway activity downstream of the destruction complex. Notably, mutations in its human homologs KMT2C and KMT2D co-occurred with mutations in the destruction complex components APC (odds ratio [OR] 2.6,  $p = 0.029$  and OR 2.6,  $p = 0.033$ ; Fisher's exact test) or AXIN1 (OR 6.8,  $p = 0.003$  and OR 19.3,  $p = 9.7e-6$ ; Fisher's exact test) in melanoma. In conclusion, our approach systematically reconstructs rewiring of functional similarities after signaling pathway activation and assesses how genes functionally adapt with regard to the non-induced condition.

## DISCUSSION

Signaling networks consist of modules, which regulate their activity in a context-dependent manner. For modules to control signal processing, genes take on or abandon certain roles together or individually. Here, we demonstrate a general approach to systematically reconstruct positive and negative functional relations between genes and assess how individual gene function and gene-gene relations change after pathway activation. We illustrate how functional similarity derived from genetic interaction profiles rewires and uses this information to define Wnt pathway state-specific modules. We further refined the state-dependent wiring diagram by inferring negative relations. In accordance with a previous study of protein-protein interactions (Vinayagam et al., 2014), our network of positive and negative functional similarities described similarities within and between modules as well as inhibitory relations between modules.

Interestingly, we observed that the regulatory hub of the Wnt signaling pathway, the  $\beta$ -catenin destruction complex, was not connected to other modules of the pathway by state-specific relations. This suggested that genetic interaction-based networks that focus on one or multiple distinct conditions incompletely reconstruct responsive processes such as cell signaling routes. We further hypothesized that components that are only active when the destruction complex is inactive can be functionally associated by correlating genetic interaction profiles of genes in their respective active state. We developed an approach that assesses how a given gene function changes after pathway activation with regard to any gene in the baseline state—for

instance, ligand-induced for a Wnt receptor complex component. These between-state gene-gene relations connected the destruction complex to various modules of the pathway, illustrating, for example, the inhibition through the Wnt receptor complex in the presence of ligands. In conclusion, this approach can identify connections in networks that (1) rewire context-specifically to (2) adopt a role relative to a “baseline” condition. Thus, in agreement with previous studies in yeast (Bandyopadhyay et al., 2010; Guérolé et al., 2013), we found that conditional genetic interaction maps increase their resolution. We further found that systematically visualizing inhibitory relations as they occur in various signaling cascades requires the investigation of between-state gene-gene relations. In contrast to previous genetic interaction network approaches, between-state relations enable the use of a given profile as a query to screen for profiles in any condition to identify compensatory mechanisms.

In perspective, our approach can be applied to conditional network data from other cell models such as yeast and human cells to investigate how biological processes respond to defined stimuli. This could be instrumental in identifying both compensatory mechanisms and vulnerabilities that occur in different genetic backgrounds such as those induced by cancer-associated mutations. With the advent of genome-editing technologies exploiting CRISPR/Cas9 (Cong et al., 2013; Hart et al., 2015; Steinhart et al., 2016), a first “static” genetic interaction map in  $\beta$ -catenin-active cancer cell lines has successfully applied a co-single-guide RNA (sgRNA) approach to group Wnt pathway components (Rosebluh et al., 2016). As such efforts continue and new co-sgRNA systems are being developed (Han et al., 2017), our approach can guide a more complete analysis of context-dependent networks to understand gene function across various model organisms. Moreover, expression profile correlation of patient sequencing data currently emerges as a promising tool to systematically assess gene function (Alvarez et al., 2016). Using such data, our approach could be used to test how gene function evolves in the presence of oncogenic mutations.

## STAR★METHODS

Detailed methods are provided in the online version of this paper and include the following:

- KEY RESOURCES TABLE
- CONTACT FOR REAGENT AND RESOURCE SHARING
- EXPERIMENTAL MODEL AND SUBJECT DETAILS
  - Tissue Culture
  - *In Vivo* RNAi in the *Drosophila* Wing Disc
- METHOD DETAILS
  - Synthesis of RNAi Reagents
  - Genome-wide RNAi Screening
  - Combinatorial RNAi
  - Dual Wnt Reporter Activity Assay in Defined Pathway States
  - Quantification of mRNA Levels
  - Immunostainings, Microscopy and Image Analysis of the *Drosophila* Wing Disc
- QUANTIFICATION AND STATISTICAL ANALYSIS
  - Screening Data Normalization
  - Modeling of Genetic Interactions

- Estimating Functional Similarity
- Connection Specificity Index (CSI)
- Signed Similarity Networks
- DATA AND SOFTWARE AVAILABILITY
- ADDITIONAL RESOURCES

## SUPPLEMENTAL INFORMATION

Supplemental Information includes six figures, two tables, and one data file and can be found with this article online at <https://doi.org/10.1016/j.cels.2017.10.015>.

## AUTHOR CONTRIBUTIONS

Conceptualization, M. Billmann and M. Boutros; Methodology, M. Billmann; Software, M. Billmann and B.F.; Formal Analysis, M. Billmann and B.F.; Investigation, M. Billmann, V.C., and M.F.E.; Resources, M. Boutros; Writing – Original Draft, M. Billmann, V.C., B.F., and M. Boutros; Writing – Review & Editing, M. Billmann and M. Boutros; Visualization, M. Billmann; Supervision, M. Boutros and B.F.; Funding Acquisition, M. Boutros.

## ACKNOWLEDGMENTS

We would like to dedicate this paper to Bernd Fischer (deceased February 22, 2017). We thank Thomas Horn, Thomas Sandmann, Marija Buljan, Marco Breinig, and Chad Myers for helpful comments on the manuscript, and members of the Boutros lab for critical discussions. M. Billmann was in part supported by the Helmholtz International School of Cancer Research and an EMBO Short-term Fellowship (ASTF 489-2014). B.F. was supported by the Helmholtz Association (VH-NG-1010). Work in the lab of M. Boutros was funded by an ERC Advanced grant (“Syngene”) of the European Research Council.

Received: January 5, 2017

Revised: May 30, 2017

Accepted: October 25, 2017

Published: November 29, 2017

## REFERENCES

- Alvarez, M.J., Shen, Y., Giorgi, F.M., Lachmann, A., Ding, B.B., Ye, B.H., and Califano, A. (2016). Functional characterization of somatic mutations in cancer using network-based inference of protein activity. *Nat. Genet.* **48**, 838–847.
- Azzolin, L., Zanconato, F., Bresolin, S., Forcato, M., Basso, G., Bicciato, S., Cordenonsi, M., and Piccolo, S. (2012). Role of TAZ as mediator of Wnt signaling. *Cell* **151**, 1443–1456.
- Bandyopadhyay, S., Mehta, M., Kuo, D., Sung, M.-K., Chuang, R., Jaehnig, E.J., Bodenmiller, B., Licon, K., Copeland, W., Shales, M., et al. (2010). Rewiring of genetic networks in response to DNA damage. *Science* **330**, 1385–1389.
- Bartscherer, K., Pelte, N., Ingelfinger, D., and Boutros, M. (2006). Secretion of Wnt ligands requires Evi, a conserved transmembrane protein. *Cell* **125**, 523–533.
- Baryshnikova, A., Costanzo, M., Kim, Y., Ding, H., Koh, J., Toufighi, K., Youn, J., Ou, J., San Luis, B.-J., Bandyopadhyay, S., et al. (2010). Quantitative analysis of fitness and genetic interactions in yeast on a genome scale. *Nat. Methods* **7**, 1017–1024.
- Baryshnikova, A., Costanzo, M., Myers, C.L., Andrews, B., and Boone, C. (2013). Genetic interaction networks: toward an understanding of heritability. *Annu. Rev. Genomics Hum. Genet.* **14**, 111–133.
- Bateson, W. (1909). *Mendel's Principles of Heredity* (Cambridge Univ. Press).
- Behrens, J., Jerchow, B.A., Würtele, M., Grimm, J., Asbrand, C., Wirtz, R., Kühl, M., Wedlich, D., and Birchmeier, W. (1998). Functional interaction of an axin homolog, conductin, with beta-catenin, APC, and GSK3beta. *Science* **280**, 596–599.
- Benjamini, Y., and Hochberg, Y. (1995). Controlling the false discovery rate: a practical and powerful approach to multiple testing. *J. Roy. Stat. Soc.* **57**, 289–300.
- Billmann, M., and Boutros, M. (2016). Methods for high-throughput RNAi screening in *Drosophila* cells. *Methods Mol. Biol.* **1478**, 95–116.
- Billmann, M., Horn, T., Fischer, B., Sandmann, T., Huber, W., and Boutros, M. (2016). A genetic interaction map of cell cycle regulators. *Mol. Biol. Cell* **27**, 1397–1407.
- Brand, A.H., and Perrimon, N. (1993). Targeted gene expression as a means of altering cell fates and generating dominant phenotypes. *Development* **118**, 401–415.
- Cavallo, R.A., Cox, R.T., Moline, M.M., Roose, J., Polevoy, G.A., Clevers, H., Pfeifer, M., and Bejsovec, A. (1998). *Drosophila* Tcf and Groucho interact to repress Wingless signalling activity. *Nature* **395**, 604–608.
- Cherbas, L., Willingham, A., Zhang, D., Yang, L., Zou, Y., Eads, B.D., Carlson, J.W., Landolin, J.M., Kapranov, P., Dumais, J., et al. (2011). The transcriptional diversity of 25 *Drosophila* cell lines. *Genome Res.* **21**, 301–314.
- Clevers, H., and Nusse, R. (2012). Wnt/ $\beta$ -catenin signaling and disease. *Cell* **149**, 1192–1205.
- Cong, L., Ran, F.A., Cox, D., Lin, S., Barretto, R., Habib, N., Hsu, P.D., Wu, X., Jiang, W., Marraffini, L.A., et al. (2013). Multiplex genome engineering using CRISPR/Cas systems. *Science* **339**, 819–823.
- Costanzo, M., Baryshnikova, A., Bellay, J., Kim, Y., Spear, E.D., Sevier, C.S., Ding, H., Koh, J.L.Y., Toufighi, K., Mostafavi, S., et al. (2010). The genetic landscape of a cell. *Science* **327**, 425–431.
- Costanzo, M., VanderSluis, B., Koch, E.N., Baryshnikova, A., Pons, C., Tan, G., Wang, W., Usaj, M., Hanchard, J., Lee, S.D., et al. (2016). A global genetic interaction network maps a wiring diagram of cellular function. *Science* **353**, <https://doi.org/10.1126/science.aaf1420>.
- Fischer, B., Sandmann, T., Horn, T., Billmann, M., Chaudhary, V., Huber, W., and Boutros, M. (2015). A map of directional genetic interactions in a metazoan cell. *Elife*. <https://doi.org/10.7554/eLife.05464>.
- Fuxman Bass, J.I., Diallo, A., Nelson, J., Soto, J.M., Myers, C.L., and Walhout, A.J.M. (2013). Using networks to measure similarity between genes: association index selection. *Nat. Methods* **10**, 1169–1176.
- Green, R., Kao, H., Audhya, A., Arur, S., Mayers, J.R., Fridolfsson, H., Schulman, M., Schloissnig, S., Niessen, S., Wang, S., et al. (2011). A high-resolution *C. elegans* essential gene network based on phenotypic profiling of a complex tissue. *Cell* **145**, 470–482.
- Gross, J.C., Chaudhary, V., Bartscherer, K., and Boutros, M. (2012). Active Wnt proteins are secreted on exosomes. *Nat. Cell Biol.* **14**, 1036–1045.
- Groth, C., Sasamura, T., Khanna, M.R., Whitley, M., and Fortini, M.E. (2013). Protein trafficking abnormalities in *Drosophila* tissues with impaired activity of the ZIP7 zinc transporter catsup. *Development* **140**, 3018–3027.
- Guérolé, A., Srivas, R., Vreeken, K., Wang, Z.Z., Wang, S., Krogan, N.J., Ideker, T., and van Attikum, H. (2013). Dissection of DNA damage responses using multiconditional genetic interaction maps. *Mol. Cell* **49**, 346–358.
- Guruharsha, K.G., Rual, J.-F., Zhai, B., Mintseris, J., Vaidya, P., Vaidya, N., Beekman, C., Wong, C., Rhee, D.Y., Cenaj, O., et al. (2011). A protein complex network of *Drosophila melanogaster*. *Cell* **147**, 690–703.
- Han, K., Jeng, E.E., Hess, G.T., Morgens, D.W., Li, A., and Bassik, M.C. (2017). Synergistic drug combinations for cancer identified in a CRISPR screen for pairwise genetic interactions. *Nat. Biotechnol.* **35**, 463–474.
- Hart, T., Chandrashekhar, M., Aregger, M., Steinhart, Z., Brown, K.R., MacLeod, G., Mis, M., Zimmermann, M., Fradet-Turcotte, A., Sun, S., et al. (2015). High-resolution CRISPR screens reveal fitness genes and genotype-specific cancer liabilities. *Cell* **163**, 1515–1526.
- Horn, T., Sandmann, T., and Boutros, M. (2010). Design and evaluation of genome-wide libraries for RNA interference screens. *Genome Biol.* **11**, R61.
- Horn, T., Sandmann, T., Fischer, B., Axelsson, E., Huber, W., and Boutros, M. (2011). Mapping of signaling networks through synthetic genetic interaction analysis by RNAi. *Nat. Methods* **8**, 341–346.

- Housden, B.E., and Perrimon, N. (2014). Spatial and temporal organization of signaling pathways. *Trends Biochem. Sci.* **39**, 457–464.
- Ji, N., Middelkoop, T.C., Mentink, R.A., Betist, M.C., Tonegawa, S., Mooijman, D., Korswagen, H.C., and van Oudenaarden, A. (2013). Feedback control of gene expression variability in the *Caenorhabditis elegans* Wnt pathway. *Cell* **155**, 869–880.
- Kakugawa, S., Langton, P.F., Zebisch, M., Howell, S.A., Chang, T.-H., Liu, Y., Feizi, T., Bineva, G., O'Reilly, N., Snijders, A.P., et al. (2015). Notum deacylates Wnt proteins to suppress signalling activity. *Nature* **519**, 187–192.
- Korinek, V., Barker, N., Morin, P.J., van Wichen, D., de Weger, R., Kinzler, K.W., Vogelstein, B., and Clevers, H. (1997). Constitutive transcriptional activation by a beta-catenin-Tcf complex in APC<sup>-/-</sup> colon carcinoma. *Science* **275**, 1784–1787.
- Lebensohn, A.M., Dubey, R., Neitzel, L.R., Tacchelly-Benites, O., Yang, E., Marceau, C.D., Davis, E.M., Patel, B.B., Bahrami-Nejad, Z., Travaglini, K.J., et al. (2016). Comparative genetic screens in human cells reveal new regulatory mechanisms in WNT signaling. *Elife* **5**, <https://doi.org/10.7554/eLife.21459>.
- Lehner, B., Crombie, C., Tischler, J., Fortunato, A., and Fraser, A.G. (2006). Systematic mapping of genetic interactions in *Caenorhabditis elegans* identifies common modifiers of diverse signaling pathways. *Nat. Genet.* **38**, 896–903.
- Li, J., Sutter, C., Parker, D.S., Blauwkamp, T., Fang, M., and Cadigan, K.M. (2007). CBP/p300 are bimodal regulators of Wnt signaling. *EMBO J.* **26**, 2284–2294.
- Livak, K.J., and Schmittgen, T.D. (2001). Analysis of relative gene expression data using real-time quantitative PCR and the 2<sup>(-Delta Delta C(T))</sup> method. *Methods* **25**, 402–408.
- Morin, P.J., Sparks, A.B., Korinek, V., Barker, N., Clevers, H., Vogelstein, B., and Kinzler, K.W. (1997). Activation of beta-catenin—Tcf signaling in colon cancer by mutations in beta-catenin or APC. *Science* **275**, 1787–1790.
- Niehrs, C. (2012). The complex world of WNT receptor signalling. *Nat. Rev. Mol. Cell Biol.* **13**, 767–779.
- Pan, C.-L., Baum, P.D., Gu, M., Jorgensen, E.M., Clark, S.G., and Garriga, G. (2008). *C. elegans* AP-2 and retromer control Wnt signaling by regulating mig-14/Wntless. *Dev. Cell* **14**, 132–139.
- Piao, S., Lee, S.-H., Kim, H., Yum, S., Stamos, J.L., Xu, Y., Lee, S.-J., Lee, J., Oh, S., Han, J.-K., et al. (2008). Direct inhibition of GSK3 $\beta$  by the phosphorylated cytoplasmic domain of LRP6 in Wnt/ $\beta$ -catenin signaling. *PLoS One* **3**, e4046.
- Rosenbluh, J., Mercer, J., Shrestha, Y., Oliver, R., Tamayo, P., Doench, J.G., Tirosh, I., Piccioni, F., Hartenian, E., Horn, H., et al. (2016). Genetic and proteomic interrogation of lower confidence candidate genes reveals signaling networks in  $\beta$ -catenin-active cancers. *Cell Syst.* **3**, 302–316.e4.
- Segre, D., DeLuna, A., Church, G.M., and Kishony, R. (2005). Modular epistasis in yeast metabolism. *Nat. Genet.* **37**, 77–83.
- Smyth, G.K. (2004). Linear models and empirical Bayes methods for assessing differential expression in microarray experiments. *Stat. Appl. Genet. Mol. Biol.* **3**, Article3.
- Steinhart, Z., Pavlovic, Z., Chandrashekhar, M., Hart, T., Wang, X., Zhang, X., Robitaille, M., Brown, K.R., Jaksani, S., Overmeer, R., et al. (2016). Genome-wide CRISPR screens reveal a Wnt-FZD5 signaling circuit as a druggable vulnerability of RNF43-mutant pancreatic tumors. *Nat. Med.* **23**, 60–68.
- Strigini, M., and Cohen, S.M. (2000). Wingless gradient formation in the *Drosophila* wing. *Curr. Biol.* **10**, 293–300.
- Tanimoto, H., Itoh, S., ten Dijke, P., and Tabata, T. (2000). Hedgehog creates a gradient of DPP activity in *Drosophila* wing imaginal discs. *Mol. Cell* **5**, 59–71.
- Thompson, B.J., and Cohen, S.M. (2006). The Hippo pathway regulates the bantam microRNA to control cell proliferation and apoptosis in *Drosophila*. *Cell* **126**, 767–774.
- Tukey, J.W. (1977). *Exploratory Data Analysis* (Addison-Wesley).
- Typas, A., Nichols, R.J., Siegele, D.A., Shales, M., Collins, S.R., Lim, B., Braberg, H., Yamamoto, N., Takeuchi, R., Wanner, B.L., et al. (2008). High-throughput, quantitative analyses of genetic interactions in *E. coli*. *Nat. Methods* **5**, 781–787.
- Vinayagam, A., Zirin, J., Roesel, C., Hu, Y., Yilmazel, B., Samsonova, A.A., Neumüller, R.A., Mohr, S.E., and Perrimon, N. (2014). Integrating protein-protein interaction networks with phenotypes reveals signs of interactions. *Nat. Methods* **11**, 94–99.
- Yanagawa, S., Lee, J.S., and Ishimoto, A. (1998). Identification and characterization of a novel line of *Drosophila* Schneider S2 cells that respond to wingless signaling. *J. Biol. Chem.* **273**, 32353–32359.
- Yu, J., Chia, J., Canning, C.A., Jones, C.M., Bard, F.A., and Virshup, D.M. (2014). WLS retrograde transport to the endoplasmic reticulum during Wnt secretion. *Dev. Cell* **29**, 277–291.
- Zeng, W., Wharton, K.A., Jr., Mack, J.A., Wang, K., Gadbow, M., Suyama, K., Klein, P.S., and Scott, M.P. (2000). naked cuticle encodes an inducible antagonist of Wnt signalling. *Nature* **403**, 789–795.

## STAR★METHODS

## KEY RESOURCES TABLE

| REAGENT or RESOURCE                                                          | SOURCE                                                                                                                | IDENTIFIER                       |
|------------------------------------------------------------------------------|-----------------------------------------------------------------------------------------------------------------------|----------------------------------|
| Antibodies                                                                   |                                                                                                                       |                                  |
| Mouse anti-Wg                                                                | Developmental System Hybridoma Bank                                                                                   | N/A                              |
| Guinea Pig anti-Sens                                                         | <a href="#">Gross et al., 2012</a>                                                                                    | N/A                              |
| anti-guinea pig-Alexa594                                                     | Invitrogen                                                                                                            | Cat #: A11076; RRID: AB_2534073  |
| anti-mouse-Alexa594                                                          | Invitrogen                                                                                                            | Cat #: A11005; RRID: AB_2534120  |
| Recombinant DNA                                                              |                                                                                                                       |                                  |
| Plasmid: pAc-wg                                                              | <a href="#">Bartscherer et al., 2006</a>                                                                              | N/A                              |
| Plasmid: dTCF-luc                                                            | <a href="#">Bartscherer et al., 2006</a>                                                                              | N/A                              |
| Plasmid: Rp128-Rluc                                                          | <a href="#">Bartscherer et al., 2006</a>                                                                              | N/A                              |
| Deposited Data                                                               |                                                                                                                       |                                  |
| Primer for dsRNAs targeting all query and template genes                     | This paper                                                                                                            | <a href="#">Tables S1 and S2</a> |
| Documented R code vignette                                                   | This paper                                                                                                            | <a href="#">Data S1</a>          |
| Raw data                                                                     | <a href="https://github.com/boutrosiab/Supplemental-Material">https://github.com/boutrosiab/Supplemental-Material</a> | WntSGI                           |
| Processed data                                                               | <a href="https://github.com/boutrosiab/Supplemental-Material">https://github.com/boutrosiab/Supplemental-Material</a> | WntSGI                           |
| Experimental Models: Cell Lines                                              |                                                                                                                       |                                  |
| <i>D. melanogaster</i> : Cell line S2R+                                      | <i>Drosophila</i> Genomics Resource Center                                                                            | FBtc0000150                      |
| <i>D. melanogaster</i> : 1182-4H                                             | <i>Drosophila</i> Genomics Resource Center                                                                            | FBtc0000177                      |
| Experimental Models: Organisms/Strains                                       |                                                                                                                       |                                  |
| <i>Drosophila</i> : <i>en-GAL4</i> , <i>UAS-GFP</i> 2 <sup>nd</sup> chr.     | <a href="#">Thompson and Cohen, 2006</a>                                                                              | N/A                              |
| <i>Drosophila</i> : <i>Catsup</i> mutant alleles <i>Catsup</i> <sup>47</sup> | <a href="#">Groth et al., 2013</a>                                                                                    | N/A                              |
| <i>Drosophila</i> : RNAi line targeting <i>Catsup</i>                        | Vienna <i>Drosophila</i> RNAi Center                                                                                  | transformant ID: 103630          |
| <i>Drosophila</i> : <i>fz3-GFP</i>                                           | Bloomington <i>Drosophila</i> Stock Center                                                                            | Bloomington stock number 43831   |
| Software and Algorithms                                                      |                                                                                                                       |                                  |
| R                                                                            | <a href="http://www.r-project.org">www.r-project.org</a>                                                              | N/A                              |
| Custom R code                                                                | <a href="https://github.com/boutrosiab/Supplemental-Material">https://github.com/boutrosiab/Supplemental-Material</a> | WntSGI                           |

## CONTACT FOR REAGENT AND RESOURCE SHARING

Further information and requests for reagents may be directed to, and will be fulfilled by the corresponding author ([m.boutros@dkfz.de](mailto:m.boutros@dkfz.de)).

## EXPERIMENTAL MODEL AND SUBJECT DETAILS

Cultured *Drosophila* cells were used to perform high-throughput screening and genetically modified flies were used for validation studies.

## Tissue Culture

Wnt signaling competent *Drosophila* S2R+ cells ([Cherbas et al., 2011](#); [Yanagawa et al., 1998](#)) were cultured in Schneider's medium (Invitrogen by ThermoFischer, Waltham, MA) supplemented with 10% fetal calve serum (FCS, Biochrom, Cambourne, UK) and 1% Penicillin/Streptomycin (Gibco by ThermoFischer). They were grown to confluence, detached by scraping and passaged using a 1:12 dilution every three days. Wnt competent 1182-4H cells ([Cherbas et al., 2011](#)) were cultured in M3 insect medium (Gibco by

ThermoFischer) supplemented with 10% FCS (Biochrom) and 1% Penicillin/Streptomycin (Gibco by ThermoFischer). They were grown to confluence, detached by scraping and passaged using a 1:3 dilution every three days.

### **In Vivo RNAi in the *Drosophila* Wing Disc**

The following *Drosophila* stocks were used: *en-GAL4*, *UAS-GFP* 2<sup>nd</sup> chr. (Thompson and Cohen, 2006), *Catsup* mutant alleles used were *Catsup*<sup>47</sup> (Groth et al., 2013), *fz3-GFP* (Bloomington stock number 43831), *hh-Gal4* (Tanimoto et al., 2000). RNAi lines targeting *Catsup* (transformant ID: 103630) were obtained from the Vienna *Drosophila* RNAi Center. Knockdown were performed by using the *UAS-Gal4* system (Brand and Perrimon, 1993). RNAi fly lines were crossed to *Hh-Gal4* driver lines and kept at 25°C.

## **METHOD DETAILS**

### **Synthesis of RNAi Reagents**

For each gene, two ~200 bp long sequence-independent double-stranded (ds) RNA reagents were designed using NEXT-RNAi software (Horn et al., 2010). The reagents were designed to avoid mismatches of 19 nt or more, more than 6 tandem tri-nucleotides of the CAN type, low complexity region or UTRs. In a two-step approach (Billmann and Boutros, 2016), the fragments were first generated by PCR on genomic *Drosophila* DNA in a 96-well format, and amplified using a primer combination preventing cross-contamination of the reagents. The DNA was transcribed into dsRNA via *in vitro* transcription (IVT). IVT products were purified via gel filtration (Bio-Gel P-30, BIO-RAD, Hercules, CA). Concentrations were measured using a NanoDrop 8000 spectrophotometer (Thermo scientific) and adjusted to 50 ng/μl.

### **Genome-wide RNAi Screening**

To target each gene in the *Drosophila* genome, the HD3 library was designed, which contained 28,950 sequence-independent dsRNAs covering 14,331 genes, 13,369 genes with at least two designs (see Figure S1A for Wnt signaling phenotype correlation between the two designs). For S2R+ and 1182-4H cells, two replicates each comprising 88 384-well assay plates were prepared (see Figure S1A for replicate correlation). To control the dynamic range of the data, each plate was supplied with dsRNA targeting the Wnt signaling regulators *evi*, *dsh*, *Apc* or *Axn*, as well as GFP as non-targeting controls and the *Renilla* luciferase (Rluc) and Firefly luciferase (Fluc) to assess the reporter signals. Each dsRNA was present at 250 ng (5 μl) per well. 11,000 S2R+ or 12,000 1182-4H cells were seeded in 20 μl serum-free medium per well and the starvation was allowed to proceed for 45 min. Subsequently, 25 μl serum and P/S-containing medium were added. The dual Wnt reporter system was used in the Wnt active state (see below).

### **Combinatorial RNAi**

The 336 selected candidate (template) genes were co-depleted with 72 query genes in a template × query gene design (Horn et al., 2011), and covering each candidate and query gene by two sequence-independent dsRNA designs. For primer sequences and query genes please see Tables S1 and S2. 125 ng (2.5 μl) of each dsRNA against the 336 template genes were spotted on a 384-well assay plate. Non-targeting reagents designed against GFP were spotted in additional 16 wells. 125 ng (2.5 μl) dsRNA against a query gene was added to each of the 352 wells in a contact-independent manner using the NanodropII dispenser (GC Biotech, Netherlands). To control the dynamic range of the data, the remaining 32 wells (without query dsRNA) of each assay plate were equipped with dsRNA targeting known Wnt regulators (see above) and GFP, Rluc and Fluc. The 336 template × 72 query gene set-up resulted in 288 assay plates per pathway state. 11,000 S2R+ cells were seeded per well following the serum starvation protocol (see above). To measure combinatorial RNAi phenotypes in the baseline, Wnt active and *Apc* loss state, the dual Wnt reporter system was adjusted as described below.

To validate genetic interactions in 1182-4H cells, 14 well-described Wnt regulators were co-depleted in a template-query gene design and tested all against all. 125 ng (2.5 μl) of two sequence-independent dsRNAs targeting each gene were spotted, and 125 ng (2.5 μl) of the query dsRNA was added. Per well, 12,000 cells were seeded using the serum starvation protocol. The dual Wnt reporter system was used in the Wnt active state (see below).

### **Dual Wnt Reporter Activity Assay in Defined Pathway States**

To quantify Wnt signaling activity, reporter plasmids were transfected 24 h past cell seeding using 0.1 μl FuGENE transfection reagent (Promega, Madison, WI) in a total volume of 10 μl. Per well 3 ng of the Rp128-Rluc (expressed the *Renilla* luciferase) and 0.5 ng of the dTCF-luc (expresses the Firefly luciferase behind a Wnt signaling-specific promoter) plasmid were used. For the *Apc* loss state, dsRNA against *Apc* and *Apc2* were added to the cell suspension before seeding in a concentration equivalent to 100 ng per well. For the baseline and *Apc* loss state, 0.02 ng, and for the Wnt active state 2 ng of the pAc-wg plasmid were used. Cells were grown at standard conditions (25°C) for up to 108 h past seeding, and reporter levels were quantified using a Mithras LB Multimode Microplate Reader (Berthold, Bad Wildbad, Germany) without filter and 0.05 s exposure time for Fluc, and using 490 nm filter settings and 0.1 s exposure time for Rluc.

### **Quantification of mRNA Levels**

Quantification of mRNA levels of the Wnt target gene *nkd* was performed in S2R+ cells.  $5 \times 10^5$  cells were seeded in 1 ml Schneider's medium (Gibco by Life Technologies) onto 10 μg dsRNA in a 6-well plate and starvation was allowed to proceed for 45 min. Total RNA



was extracted after 72 h using the RNeasy Mini Kit protocol (Qiagen) followed by cDNA synthesis using the RevertAid First Strand cDNA Synthesis Kit and oligo(dT)<sub>18</sub> primer (Fermentas by Life Technologies), including on-column DNaseI digest of residual genomic DNA. The quantitative RT-PCR was performed using the TaqMan Universal ProbeLibrary (UPL) system (Roche, Mannheim, Germany). Specific Cp values were normalized. The Cp values of the *RpL32* (also *rp49*) house-keeping gene, and the fold-change was estimated via the  $2^{-\text{ddCt}}$  method (Livak and Schmittgen, 2001).

### Immunostainings, Microscopy and Image Analysis of the *Drosophila* Wing Disc

Wing discs were dissected from 3<sup>rd</sup> instar larvae in Schneider's medium (Gibco by Life Technologies) and fixed for 20 min in 4% PFA in PBS. Permeabilization was allowed to proceed for 30 min in 0.2% Triton X-100 in PBS (PTx), followed by 60 min blocking in 0.2% BSA and overnight incubation with the primary antibody at 4°C. After washing, the secondary antibody incubation was performed for 60 min at RT, and washed again in PTx and finally with PBS.

Extracellular Wg staining was performed as described previously (Strigini and Cohen, 2000). Wing discs were mounted in Vecta-shield Mounting Medium (Vector Laboratories). Images were acquired at a Leica TCS Sp5 confocal microscope. Signal intensities were assessed using FIJI. Separate channel images were assembled using Adobe Photoshop CS6.

The following antibodies were used: Mouse Anti-Wg (4D4s, obtained from Developmental System Hybridoma Bank) 1:5 for extracellular and 1:50 for total staining, Rabbit-anti-Dll 1:200 (a gift from S. Carroll), Guinea Pig anti-Sens 1:300 (Gross et al., 2012). Secondary antibodies used were anti-guinea pig-Alexa594 (1:500 (A11076), Invitrogen), anti-mouse-Alexa594 (1:500, (A11005), Invitrogen).

## QUANTIFICATION AND STATISTICAL ANALYSIS

### Screening Data Normalization

To account for plate effects in the genome-wide or combinatorial RNAi screening data, the Wnt signaling-specific (Firefly luciferase behind dTCF binding sites) and viability (*Renilla* luciferase) signals were separately normalized to a set of controls per 384-well plate by division by the median thereof. In the genome-wide screen the controls comprised 18 wells, and in the combinatorial RNAi screens 32 wells per assay plate. Each control well contained one dsRNA reagent. Controls covered biological (known regulators) and non-targeting controls. The data were log<sub>2</sub>-transformed. In each well, the viability effect in the Firefly luciferase signal was corrected by subtracting the (log<sub>2</sub>-transformed) *Renilla* luciferase signal.

For the genome-wide screening data, the global dependency of the Wnt signaling-specific signal on the viability was accounted for, using LOESS (LOcally WEighted Scatter-plot Smoother) regression. The residuals were bin-wise variance-corrected, generating Wnt signaling activity z-scores. For details and documented code, see [Supplemental Information](#).

### Modeling of Genetic Interactions

Genetic interaction scores ( $\pi$ -scores) were estimated for each pair of dsRNA reagents as previously described (Horn et al., 2011). This multiplicative model was applied on the normalized Wnt activity signal. This model uses a multiplicative neutrality function, assuming that if two genes act independently the product of their individual phenotypes equals the combined phenotype. The single gene effects were estimated by Tukey's median polish procedure (using the R function *medpolish*). The function was applied to the matrix of log<sub>2</sub>-transformed values where rows represent template RNAi reagents (plus 32 non-targeting reagents) and columns represent query RNAi reagents. Row and column medians are iteratively subtracted until the sum of absolute residuals is close to '0' (Tukey, 1977). Fitted row effects illustrate template and fitted column effects illustrate query RNAi effects, the residual represents the genetic interaction score. For each gene pair, four measurements, which comprise two sequence-independent dsRNAs against the template and query gene, respectively, were taken (see [Figure S2D](#) for comparison of genetic interaction scores of the four dsRNA design combinations of all tested gene pairs). Averaging the four interaction scores generated the  $\pi$ -score for each gene pair. To test the significance of all pair-wise genetic interactions, *p*-values were calculated by the moderated *t*-test (*limma*), which estimates the mean and standard errors of the four interaction scores for each gene pair, followed by empirical Bayes shrinkage of the SEM (Smyth, 2004). *p*-values were adjusting for multiple testing by controlling the false discovery rate (FDR) applying the method of Benjamini-Hochberg (Benjamini and Hochberg, 1995). [Figure S2F](#) illustrates how the FDR relates to the difference in  $\pi$ -scores in a replication study using five of the 72 query genes. For details and documented code, see [Supplemental Information](#).

### Estimating Functional Similarity

The state-specific similarity of gene function was estimated by calculating the pairwise Pearson correlation coefficients (PCC) between the genetic interaction profiles separately for each Wnt pathway state (state-specific PCC). The state-specific profiles included the  $\pi$ -scores between a given gene and the 72 query genes, which covered known regulators of the Wnt signaling pathway as well as representative components of 'other' signaling pathways, and cellular processes including vesicle trafficking, transcriptional, protein turnover or cell cycle regulation.

Between-state functional similarity was estimated by calculating the pairwise PCC between the genetic interaction profile (along the 72 query genes) for a given gene (A) in the baseline state and another gene (B) in an active state. Note that this provided two scores for each gene pair since both genes A and B can be in the baseline and a given active state. Moreover, the PCC of  $A_{\text{baseline}}$  and  $A_{\text{active}}$  does not equal 1.

### Connection Specificity Index (CSI)

The connectivity specificity index (CSI) is based on a correlation matrix. For each pair of target genes, the Pearson correlation coefficient (PCC) of the two genetic interaction profiles along all query genes was computed. The CSI of a gene pair A-B was then defined as the fraction of genes connected to A and B that have a PCC smaller than the PCC of A and B. A constant of 0.1 was applied in the CSI definition of (Green et al., 2011).

### Signed Similarity Networks

To visualize potential functional connections between genes, they were placed in a network graph and connected if the absolute PCC of their genetic interaction profiles exceeded a given threshold. A force-directed layout using the absolute PCC over the given threshold as weighted edges was applied to determine the position of nodes (genes), unless indicated otherwise in the figure legend. Therefore, positive and negative coefficients were given the same attraction force based on their absolute value. For details and documented code, see [Supplemental Information](#).

### DATA AND SOFTWARE AVAILABILITY

All computational analyses are available through the WntSGI R package containing the raw data and the code to process and illustrate the data. The WntSGI package is available through Github (<https://github.com/boutroslab/Supplemental-Material>). The documented R code vignette is also available with this article online (see [Data S1](#)).

### ADDITIONAL RESOURCES

See [Data and Software Availability](#).

**Cell Systems, Volume 6**

**Supplemental Information**

**Widespread Rewiring of Genetic Networks  
upon Cancer Signaling Pathway Activation**

**Maximilian Billmann, Varun Chaudhary, Mostafa F. ElMaghraby, Bernd Fischer, and Michael Boutros**

**Table S2: Gene identifier for the 72 query genes used in the study. Related to Figure 1. For the two independent dsRNA sequences used to target those query genes, please see Table S1.**

| <b>FBgn ID</b> | <b>CG ID</b> | <b>Symbol</b> |
|----------------|--------------|---------------|
| FBgn0001324    | CG8491       | kto           |
| FBgn0004379    | CG10923      | Klp67A        |
| FBgn0010380    | CG12532      | AP-1-2beta    |
| FBgn0010379    | CG4006       | Akt1          |
| FBgn0034970    | CG4005       | yki           |
| FBgn0052675    | CG32675      | Tango5        |
| FBgn0039907    | CG2041       | lgs           |
| FBgn0026598    | CG6193       | Apc2          |
| FBgn0004597    | CG7281       | CycC          |
| FBgn0026597    | CG7926       | Axn           |
| FBgn0043012    | CG6056       | AP-2sigma     |
| FBgn0023423    | CG3412       | slmb          |
| FBgn0015589    | CG1451       | Apc           |
| FBgn0015391    | CG11397      | glu           |
| FBgn0250786    | CG3733       | Chd1          |
| FBgn0005671    | CG17369      | Vha55         |
| FBgn0025830    | CG5859       | IntS8         |
| FBgn0000212    | CG5942       | brm           |
| FBgn0024921    | CG7398       | Trn           |
| FBgn0030276    | CG1938       | Dlic          |
| FBgn0001291    | CG2275       | Jra           |
| FBgn0002945    | CG11614      | nkd           |
| FBgn0004378    | CG9191       | Klp61F        |
| FBgn0003013    | CG7467       | osa           |
| FBgn0034964    | CG3173       | IntS1         |
| FBgn0032863    | CG2508       | Cdc23         |
| FBgn0036038    | CG18176      | defl          |
| FBgn0031050    | CG12235      | Arp10         |
| FBgn0036141    | CG6210       | wls           |
| FBgn0021825    | CG8269       | Dmn           |
| FBgn0000117    | CG11579      | arm           |
| FBgn0025781    | CG6759       | Cdc16         |
| FBgn0261385    | CG2092       | scra          |
| FBgn0000463    | CG3619       | DI            |
| FBgn0085432    | CG34403      | pan           |
| FBgn0004647    | CG3936       | N             |
| FBgn0001219    | CG4264       | Hsc70-4       |
| FBgn0013749    | CG11027      | Arf102F       |
| FBgn0004009    | CG4889       | wg            |
| FBgn0053526    | CG33526      | PNUTS         |
| FBgn0000499    | CG18361      | dsh           |
| FBgn0003371    | CG2621       | sgg           |
| FBgn0052654    | CG32654      | Sec16         |
| FBgn0020238    | CG31196      | 14-3-3epsilon |
| FBgn0004390    | CG6721       | RasGAP1       |
| FBgn0003415    | CG9936       | skd           |
| FBgn0004859    | CG2125       | ci            |
| FBgn0000119    | CG5912       | arr           |
| FBgn0261456    | CG11228      | hpo           |
| FBgn0014020    | CG8416       | Rho1          |
| FBgn0043900    | CG11518      | pygo          |
| FBgn0015618    | CG10572      | Cdk8          |
| FBgn0031030    | CG14217      | Tao           |
| FBgn0010315    | CG9096       | CycD          |
| FBgn0001218    | CG4147       | Hsc70-3       |
| FBgn0035851    | CG7999       | MED24         |
| FBgn0001085    | CG17697      | fz            |
| FBgn0001230    | CG5436       | Hsp68         |
| FBgn0025637    | CG16983      | skpA          |
| FBgn0016797    | CG9739       | fz2           |
| FBgn0029709    | CG3564       | CHOp24        |
| FBgn0005386    | CG8887       | ash1          |
| FBgn0034708    | CG5625       | Vps35         |
| FBgn0030093    | CG7055       | dalao         |
| FBgn0002022    | CG10449      | Catsup        |
| FBgn0000405    | CG3510       | CycB          |
| FBgn0026379    | CG5671       | Pten          |
| FBgn0037573    | CG7483       | eIF4AIII      |
| FBgn0044028    | CG13076      | Notum         |
| FBgn0015024    | CG2028       | Cklalpha      |
| FBgn0086357    | CG9539       | Sec61alpha    |
| FBgn0014411    | CG14804      | Vps26         |

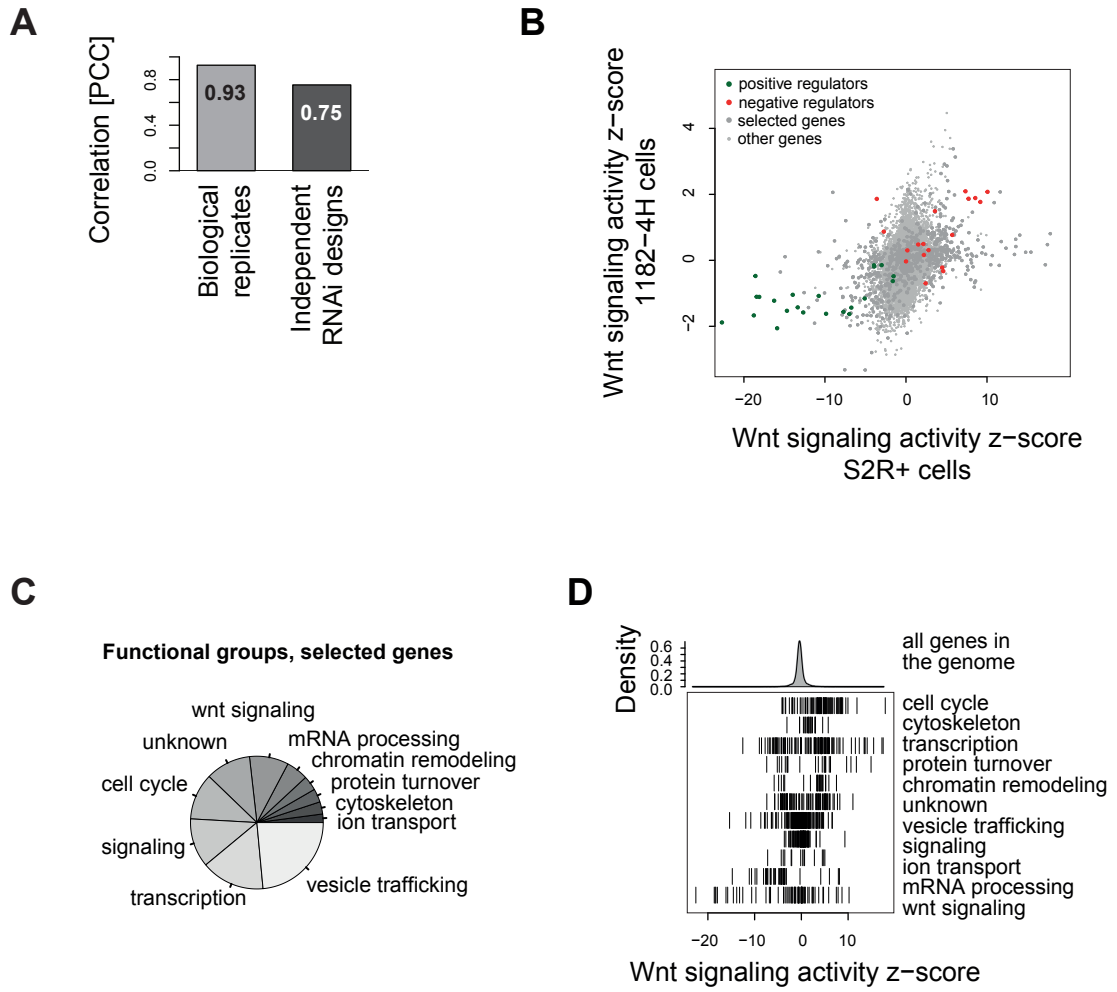

Figure S1

**Figure S1.** Gene prioritization for genetic interaction analysis in the Wnt signaling pathway. Related to Figure 1. **(A)** Correlation (Pearson correlation coefficient, PCC) of normalized Wnt signaling activity between the biological replicates of the genome-wide RNAi screen, or the two independent dsRNA designs against 13,369 of the 14,331 targeted genes. **(B)** Wnt activity z-scores in *Drosophila* S2R+ and 1182-4H cells. Core Wnt pathway components are highlighted in green (positive regulators) and red (negative regulators). **(C)** Functional groups of the 336 selected genes for Wnt pathway state-dependent quantification of genetic interactions. Genes were assigned to the groups by manual curation. **(D)** Wnt pathway activity z-scores of the selected genes and per functional group as illustrated in (C). Distribution of all dsRNA designs is shown on top for relative comparison.

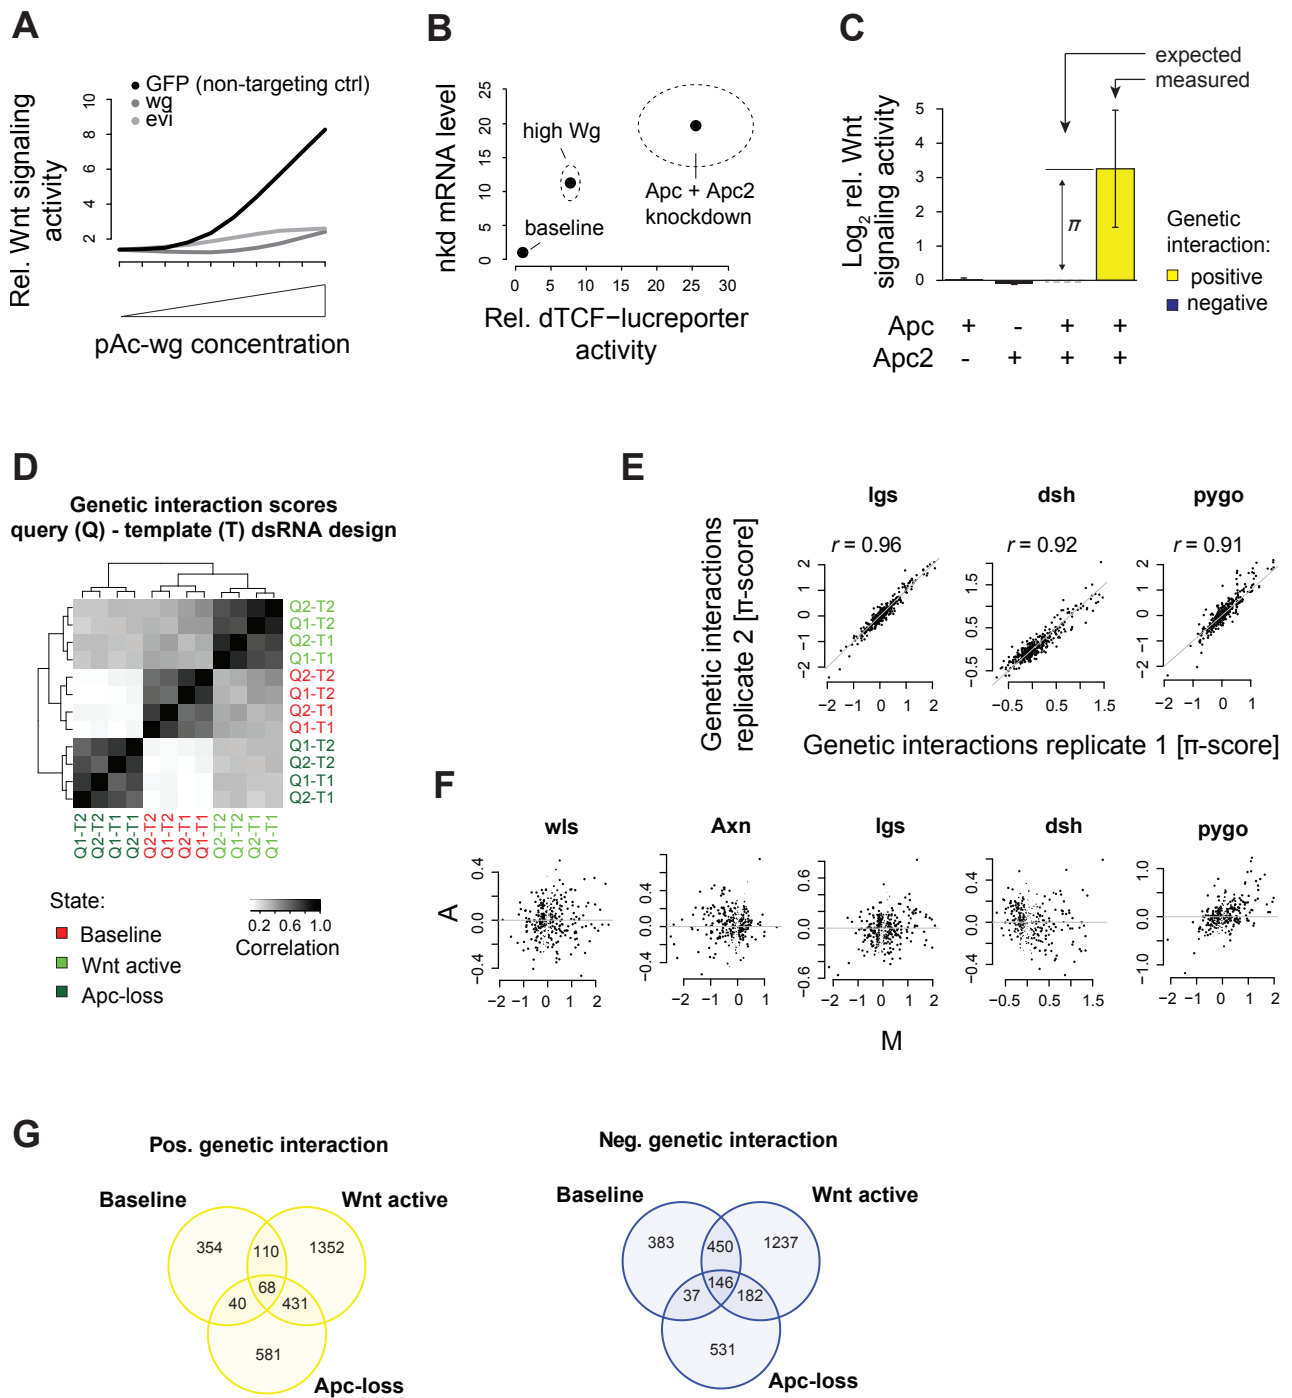

Figure S2

**Figure S2.** Distinct modes of Wnt pathway activation. Related to Figure 1. **(A)** Fold-change Wnt pathway activity upon increasing concentrations of transfected pAc-wg plasmid. The wildtype pathway activity was measured in 32 wells per concentration and upon transfection of GFP dsRNA (black line). Knockdown of two independent dsRNAs against *wg* and *evi* (*wls*) illustrates that the pathway activity increase was due to Wg expression and secretion (by its cargo receptor Evi). **(B)** Activity levels of the Wnt-specific dTCF-luc reporter and mRNA levels of the Wnt target gene *nkd* in the three pathway states in which we screened for genetic interactions. Wnt reporter activity was measured in 576 wells distributed over six screening batches and *nkd* mRNA levels were quantified by qPCR in biological triplicates. Dashed ellipses illustrate the standard deviation of the data. The data was normalized to the baseline state value. **(C)** Single and combinatorial knockdown phenotypes of *Apc* and *Apc2* illustrating a positive genetic interaction (FDR of 1%). Error bars correspond to the bootstrapped MAD for the single knockdown effects and SD for the combinatorial knockdown measurements. **(D)** Comparison of genetic interaction score replicates within and between states. For each pair of a query (Q) and template (T) gene all four combinations of two independent dsRNA designs were scored independently. Q1-T1 represents the 24120 scores measured between the first query and the first template dsRNA design with the scores measured with the other three Q-T combinations. The Pearson correlation coefficient was used to compare replicates. **(E)** Reproducibility of  $\pi$ -scores with re-screened (four replicates each) query genes *lgs*, *dsh* and *pygo*, which cover the receptor level and target gene transcription. Pearson correlation coefficients are highly significant ( $p < 2.2e-16$ ). **(F)** M-A-plot showing the deviation A between replicates from their mean M for the five query genes that were re-screened. The size of the dots represents  $1 - \text{FDR}$  for each genetic interaction (called for replicate 1). **(G)** Overlap of significant positive (yellow) and negative (blue) genetic interaction (FDR  $< 1\%$ ).



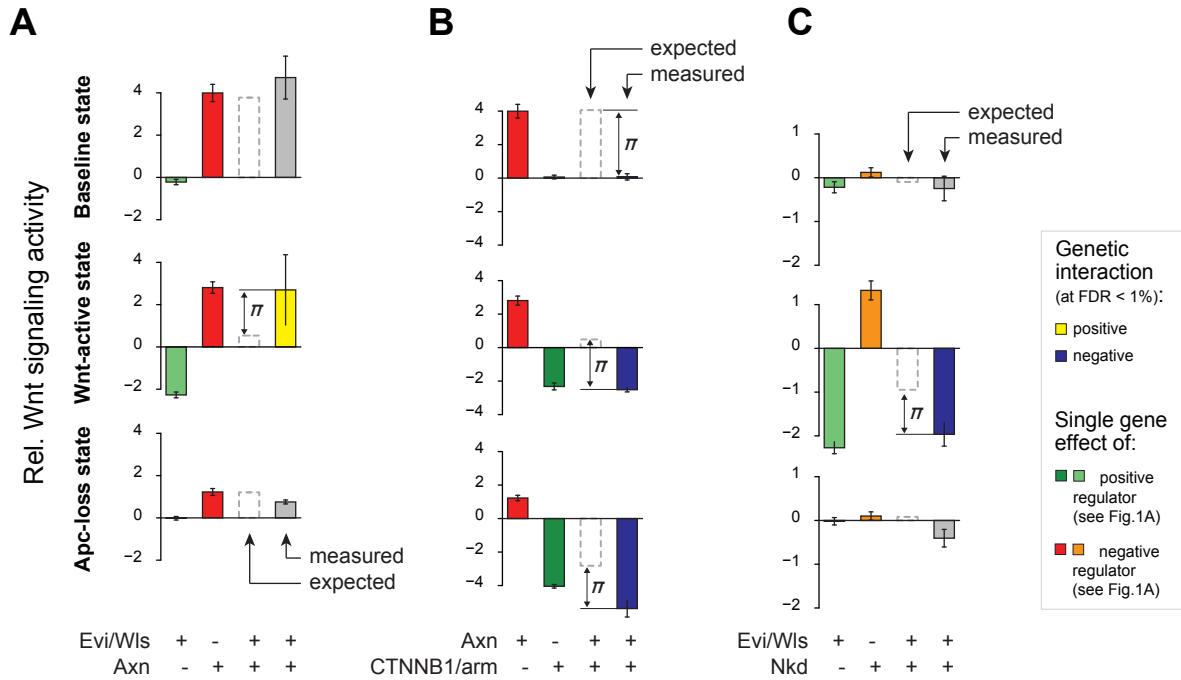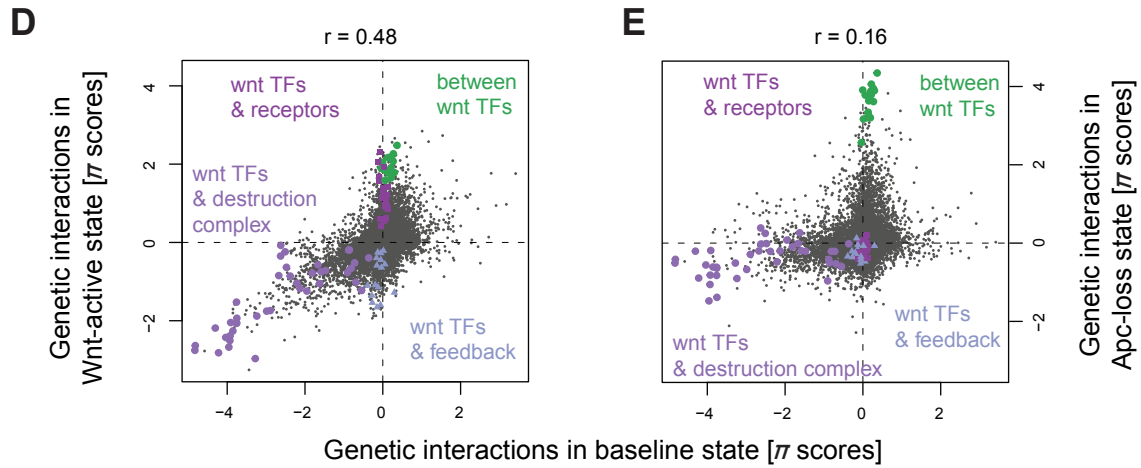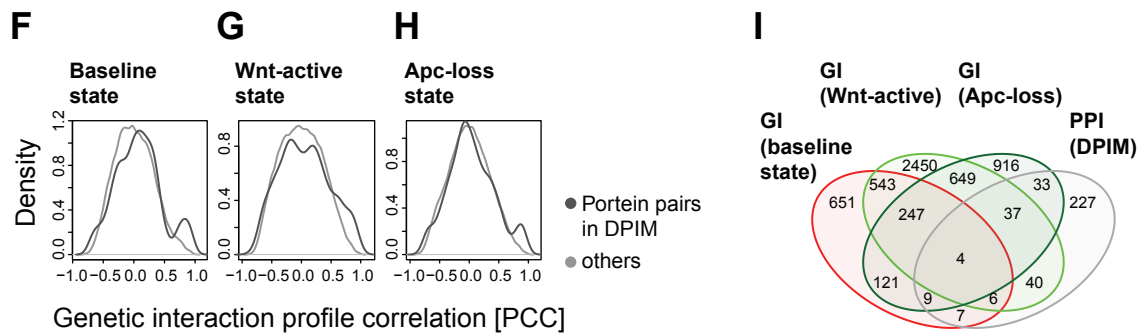

Figure S3

**Figure S3.** State-dependent genetic interactions of Wnt signaling. Related to Figure 1. **(A-C)** Combinatorial RNAi enables quantification of genetic interactions representing epistatic relations in the Wnt pathway. Single knockdown phenotypes were estimated from phenotypes of two independent dsRNAs in 144 different genetic backgrounds each (error bars show standard error of median determined by bootstrapping). The white dashed bar indicates the expected combinatorial knockdown effect for each gene pair using a multiplicative neutrality function. The measured combinatorial phenotype illustrates the median of the four possible combinations of two independent dsRNA designs against each gene. The difference between the expected and measured combinatorial phenotype is quantified as a  $\pi$ -score and quantifies the genetic interaction (yellow if positive, blue if negative at FDR < 1%). The data is presented at  $\log_2$  scale. Examples from the Wnt active state are shown in Figure 1C, D. **(D, E)** Complete genetic interactions measured in the baseline state versus ligand-mediated (D) or Apc loss-mediated (G) induction. Genetic interactions between members of known selected functional modules are highlighted. **(F-H)** Comparison of genetic interaction profile correlation and protein-protein interactions. Density of genetic interaction profile correlation of gene pairs that share a protein-protein interaction as reported previously (Guruharsha et al., 2011) (darker line) and those that do not share an interaction in this study (lighter grey line). **(I)** Overlap of significant genetic interactions (FDR 1%) in the baseline, Wnt active and Apc-loss state as well as protein-protein interactions.

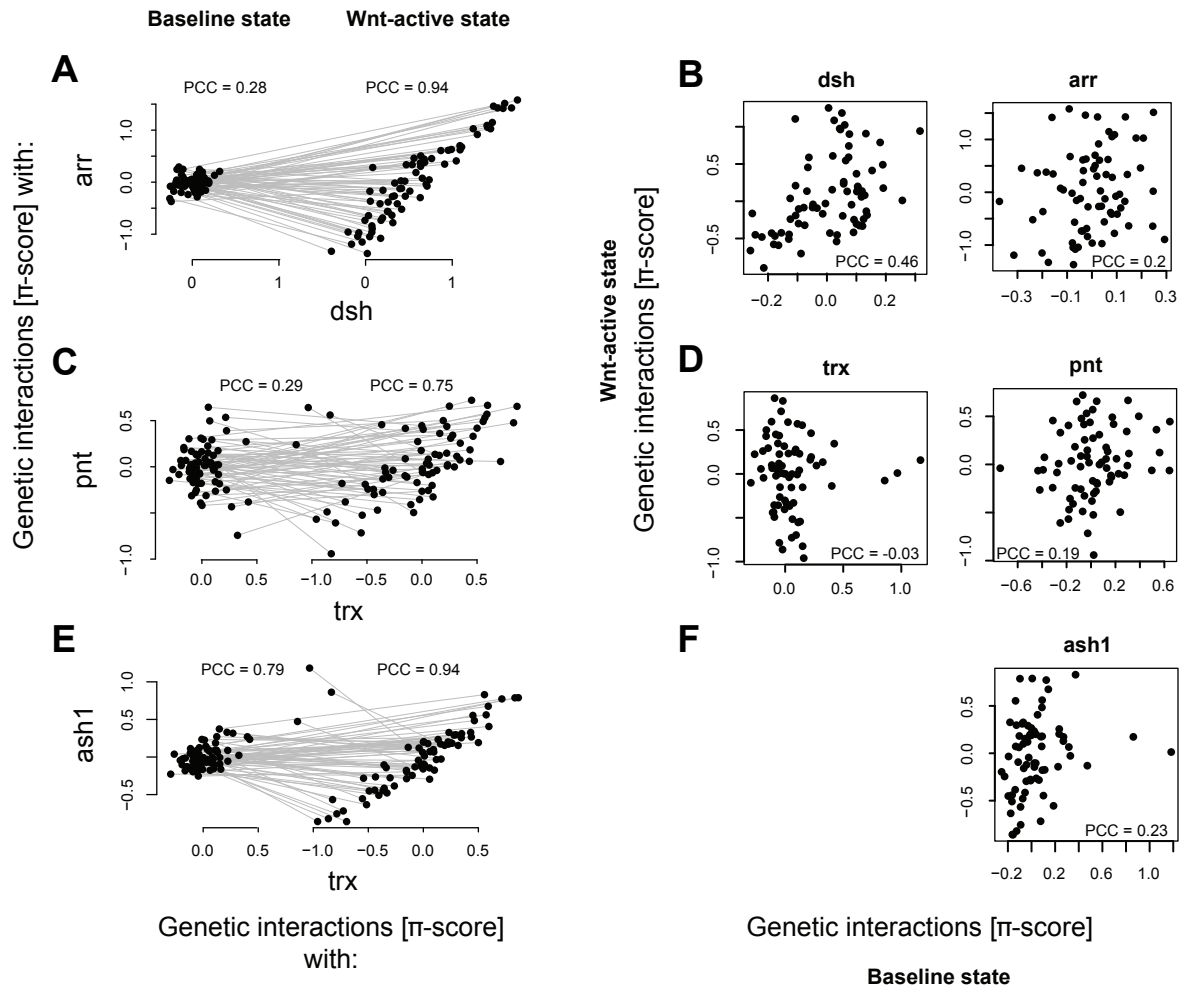

Figure S4

**Figure S4.** Genetic interaction profile self-correlation between pathway states and state-specific gene-gene profile correlation. Related to Figure 3. **(A, C, E)** Change of genetic interaction profiles of receptor complex components *arr* and *dsh* (A), transcriptional regulators *trx* and *pnt* (C) or *ash1* (E) from baseline to Wnt-active state. Grey lines connect genetic interaction scores between the gene indicated at the axis and a given query gene. **(B, D, F)** Self-correlation of genetic interaction profiles of the above-mentioned genes between baseline and Wnt-active state.

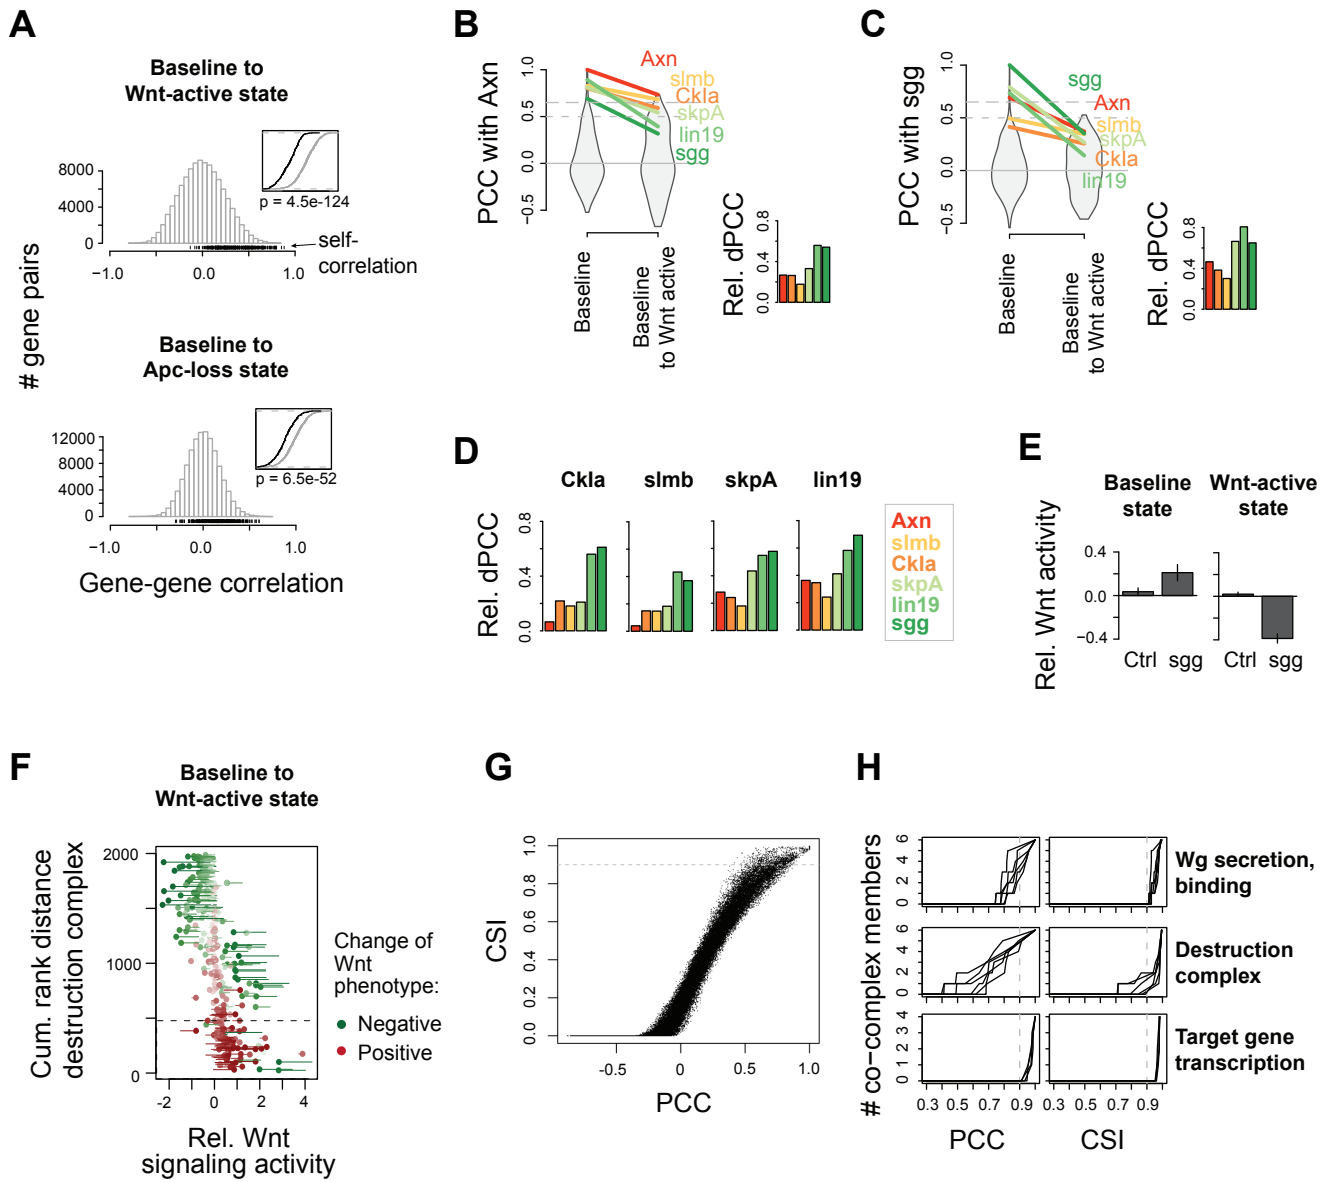

Figure S5

**Figure S5.** Functional plasticity of destruction complex components. Related to Figure 4. **(A)** Distribution of the 112,560 gene-gene between-state relations between baseline and Wnt-active (left) or Apc-loss (right) state. **(B)** Comparison of baseline-specific similarity (Pearson correlation coefficient (PCC) between genetic interaction profiles) with between baseline and Wnt-active state similarity of baseline state Axn with other destruction complex components. The relative differential PCC (Rel. dPCC) shows the slope (baseline-specific PCC minus between-state PCC) relative to the respective baseline-specific PCC. The violin plots show all PCCs with Axn. **(C)** Comparison of baseline-specific similarity with between baseline and Wnt-active state similarity of baseline state sgg with other destruction complex components. **(D)** Relative differential PCC of remaining destruction complex components. **(E)** sgg knockdown effect on Wnt signaling activity in the baseline and Wnt-active state. The single knockdown phenotype was estimated from phenotypes of two independent dsRNAs in 144 different genetic backgrounds each (error bars show standard error of median determined by bootstrapping). **(F)** Change of the single knockdown phenotype upon ligand-mediated pathway activation. Gene depletion lead to more negative (green) or positive (red) pathway activity. The order of genes (y axis) was determined by the between-state cumulative rank distance shown in (Figure 4B). **(G)** Comparison of PCC and CSI illustrating pair-wise similarity in the Wnt active state. The dotted line represents the threshold applied for identifying functional modules in Figure 4D, E. **(H)** Number of members of a given functional module that showed genetic interaction profile similarity with each of the module members when considering the PCC (left) or the CSI (right).

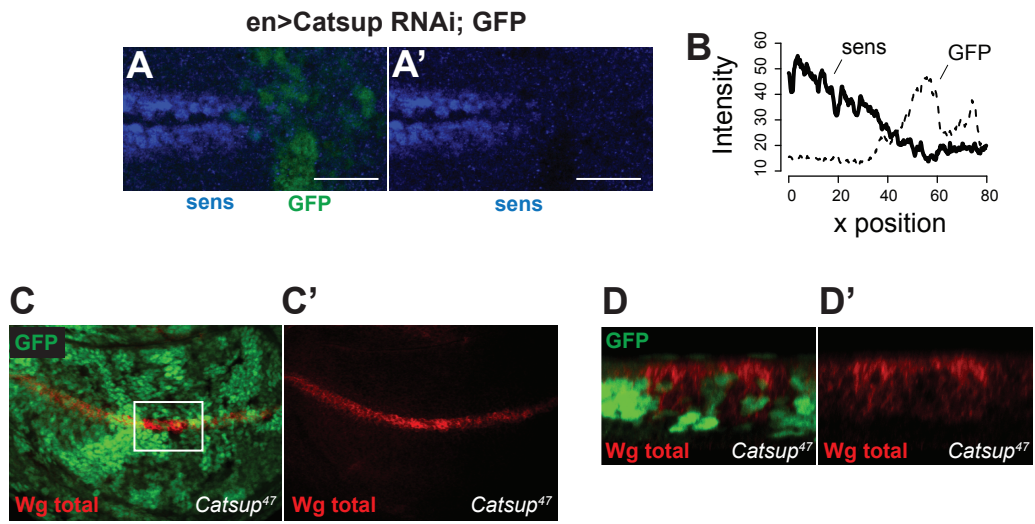

**Figure S6**

**Figure S6.** *Catsup* is required for Wg secretion. Related to Figure 5. **(A)** Knockdown of *Catsup* depletes Wnt target gene *sens* expression in the *Drosophila* wing disc. **(B)** Quantification of *sens* expression along the A/P axis of the wing disc. enGal4/UAS-*Catsup*RNAi, posterior to the right. *sens* staining intensity was quantified using FIJI (n > 4 wing discs). **(C)** Knockout of *Catsup* in the *Drosophila* wing disc leads to Wg accumulation in the Wg producing cells. **(D)** Wg accumulates at the apical side of the Wg secreting cells in the wing disc. This cross section was reconstructed using z-stacks. *Catsup*<sup>47</sup> clones in the *Drosophila* wing disc are marked by the absence of GFP expression.
